# Supplementary material for: Genetic Analysis of the Cardiac Methylome at Single Nucleotide Resolution in a Model of Human Cardiovascular Disease
Source: PubMed Central journal article supplement (PMC4256262; doi:10.1371/journal.pgen.1004813), 2014-12-04
Supplement: pgen.1004813.s011.pdf [file pgen.1004813.s011.pdf]

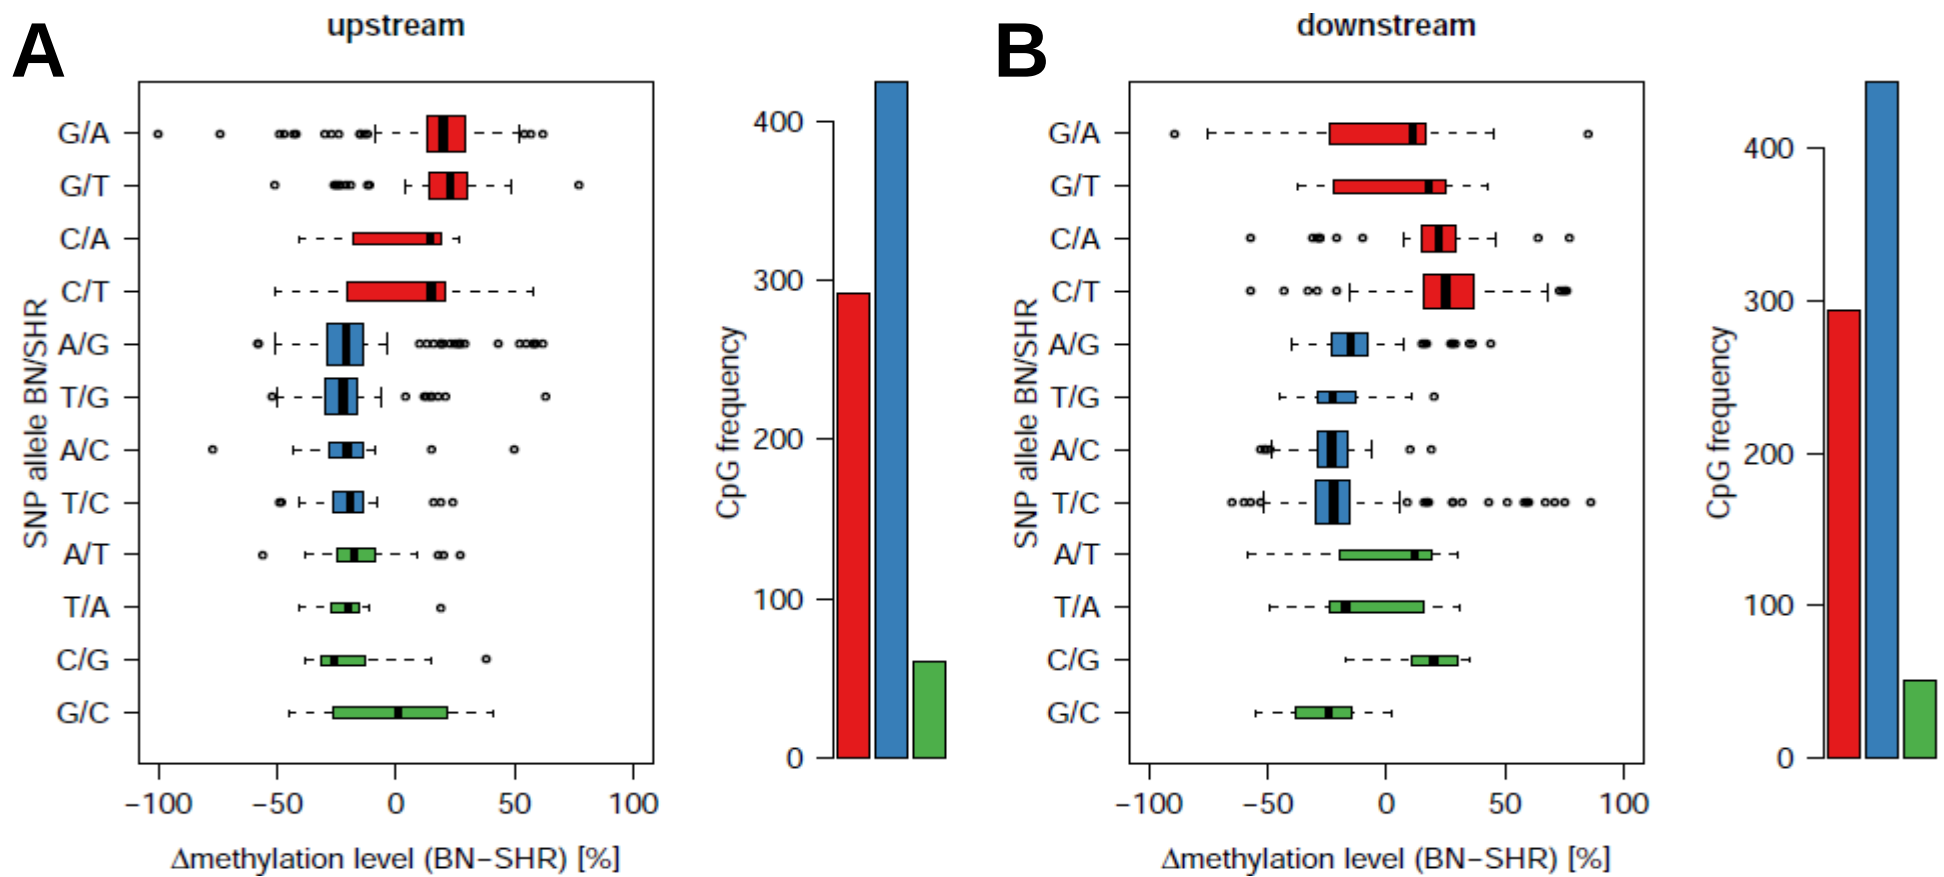

Figure S11
