# Supplementary material for: Genetic Analysis of the Cardiac Methylome at Single Nucleotide Resolution in a Model of Human Cardiovascular Disease
Source: PubMed Central journal article supplement (PMC4256262; doi:10.1371/journal.pgen.1004813), 2014-12-04
Supplement: pgen.1004813.s014.pdf [file pgen.1004813.s014.pdf]

**Table S1 Mapping and filtering statistics for whole genome bisulfite sequencing reads generated in BN and SHR rats**

| Sample           | Total Reads  | Mapped Reads |           | Mapped Bases | Depth of Coverage | Mapped Bases After Filtering | Depth of Coverage After Filtering |
|------------------|--------------|--------------|-----------|--------------|-------------------|------------------------------|-----------------------------------|
|                  | [millions]   | [millions]   | [%]       | [billions]   | [x-fold]          | [billions]                   | [x-fold]                          |
| BN1              | 258          | 230          | 89        | 17.1         | 6.7               | 11.3                         | 4.4                               |
| BN2              | 413          | 361          | 87        | 27.4         | 12.6              | 18.5                         | 7.2                               |
| BN3              | 454          | 404          | 89        | 31.9         | 10.7              | 21.6                         | 8.4                               |
| BN4              | 370          | 340          | 92        | 32.3         | 12.4              | 22.7                         | 8.8                               |
| <b>BN total</b>  | <b>1,495</b> | <b>1,336</b> | <b>89</b> | <b>108.7</b> | <b>42.3</b>       | <b>74.1</b>                  | <b>28.8</b>                       |
| SHR1             | 497          | 448          | 91        | 38.4         | 14.9              | 26.3                         | 10.2                              |
| SHR2             | 452          | 398          | 89        | 30.2         | 11.7              | 20.8                         | 8.1                               |
| SHR3             | 421          | 369          | 90        | 28.3         | 11.0              | 19.4                         | 7.5                               |
| SHR4             | 391          | 356          | 91        | 30.7         | 11.9              | 21.2                         | 8.2                               |
| <b>SHR total</b> | <b>1,762</b> | <b>1,571</b> | <b>89</b> | <b>127.6</b> | <b>49.6</b>       | <b>87.7</b>                  | <b>34.1</b>                       |
