# Supplementary material for: Genetic Analysis of the Cardiac Methylome at Single Nucleotide Resolution in a Model of Human Cardiovascular Disease
Source: PubMed Central journal article supplement (PMC4256262; doi:10.1371/journal.pgen.1004813), 2014-12-04
Supplement: pgen.1004813.s015.pdf [file pgen.1004813.s015.pdf]

Table S2 Gene Ontology analysis of genes associated with differentially methylated regions

| Ontology                  | Term ID           | Term                                                  | Genes with annotation | Genes annotated with term | Fold enrichment | P value         | P value FDR adjusted |
|---------------------------|-------------------|-------------------------------------------------------|-----------------------|---------------------------|-----------------|-----------------|----------------------|
| <b>cellular component</b> | <b>GO:0005886</b> | <b>plasma membrane</b>                                | <b>780</b>            | <b>259</b>                | <b>1.6</b>      | <b>3.83E-17</b> | <b>1.21E-14</b>      |
| <i>cellular component</i> | <i>GO:0044459</i> | <i>plasma membrane part</i>                           | <i>780</i>            | <i>155</i>                | <i>1.7</i>      | <i>2.34E-11</i> | <i>3.70E-09</i>      |
| <b>cellular component</b> | <b>GO:0005856</b> | <b>cytoskeleton</b>                                   | <b>780</b>            | <b>95</b>                 | <b>1.5</b>      | <b>2.30E-05</b> | <b>1.81E-03</b>      |
| <b>cellular component</b> | <b>GO:0005737</b> | <b>cytoplasm</b>                                      | <b>780</b>            | <b>459</b>                | <b>1.1</b>      | <b>2.74E-05</b> | <b>1.73E-03</b>      |
| <b>cellular component</b> | <b>GO:0043005</b> | <b>neuron projection</b>                              | <b>780</b>            | <b>55</b>                 | <b>1.8</b>      | <b>1.62E-05</b> | <b>1.71E-03</b>      |
| <b>biological process</b> | <b>GO:0030182</b> | <b>neuron differentiation</b>                         | <b>745</b>            | <b>60</b>                 | <b>2.0</b>      | <b>7.37E-07</b> | <b>2.92E-04</b>      |
| <i>biological process</i> | <i>GO:0048666</i> | <i>neuron development</i>                             | <i>745</i>            | <i>48</i>                 | <i>2.1</i>      | <i>2.56E-06</i> | <i>5.79E-04</i>      |
| <i>biological process</i> | <i>GO:0048513</i> | <i>organ development</i>                              | <i>745</i>            | <i>168</i>                | <i>1.5</i>      | <i>4.19E-09</i> | <i>6.65E-06</i>      |
| <i>biological process</i> | <i>GO:0000904</i> | <i>cell morphogenesis involved in differentiation</i> | <i>745</i>            | <i>38</i>                 | <i>2.4</i>      | <i>1.45E-06</i> | <i>4.60E-04</i>      |
| <i>biological process</i> | <i>GO:0007399</i> | <i>nervous system development</i>                     | <i>745</i>            | <i>100</i>                | <i>1.5</i>      | <i>1.70E-05</i> | <i>2.44E-03</i>      |
| <i>biological process</i> | <i>GO:0048812</i> | <i>neuron projection morphogenesis</i>                | <i>745</i>            | <i>33</i>                 | <i>2.3</i>      | <i>1.19E-05</i> | <i>1.89E-03</i>      |
| <i>biological process</i> | <i>GO:0022008</i> | <i>neurogenesis</i>                                   | <i>745</i>            | <i>73</i>                 | <i>1.7</i>      | <i>9.74E-06</i> | <i>1.71E-03</i>      |
| <i>biological process</i> | <i>GO:0032989</i> | <i>cellular component morphogenesis</i>               | <i>745</i>            | <i>48</i>                 | <i>1.9</i>      | <i>2.57E-05</i> | <i>3.39E-03</i>      |
| <i>biological process</i> | <i>GO:0048468</i> | <i>cell development</i>                               | <i>745</i>            | <i>76</i>                 | <i>1.7</i>      | <i>4.38E-06</i> | <i>8.67E-04</i>      |
| <b>biological process</b> | <b>GO:0010646</b> | <b>regulation of cell communication</b>               | <b>745</b>            | <b>103</b>                | <b>1.6</b>      | <b>5.42E-07</b> | <b>2.86E-04</b>      |
| <b>biological process</b> | <b>GO:0009966</b> | <b>regulation of signal transduction</b>              | <b>745</b>            | <b>84</b>                 | <b>1.7</b>      | <b>2.35E-06</b> | <b>6.20E-04</b>      |
| <b>biological process</b> | <b>GO:0009888</b> | <b>tissue development</b>                             | <b>745</b>            | <b>80</b>                 | <b>1.9</b>      | <b>1.56E-08</b> | <b>1.24E-05</b>      |

Shown are terms statistically significantly enriched ( $p < 0.05$ ) after false discovery rate (FDR) adjustment. Terms were clustered with REVIGO (Supek et al, 2011). Cluster representatives are shown in bold, more specific cluster members are shown below in italics.
