# Supplementary material for: Genetic Analysis of the Cardiac Methylome at Single Nucleotide Resolution in a Model of Human Cardiovascular Disease
Source: PubMed Central journal article supplement (PMC4256262; doi:10.1371/journal.pgen.1004813), 2014-12-04
Supplement: pgen.1004813.s016.pdf [file pgen.1004813.s016.pdf]

**Table S3 CpG dinucleotides tested for linkage in recombinant inbred strains**

| Gene ID <sup>a</sup>               | CpG chromosome, coordinate and strand | WGBS BN <sup>b</sup> | WGBS SHR <sup>b</sup> | WGBS difference <sup>b</sup> | BN (n=4) <sup>c</sup> | SHR (n=4) <sup>c</sup> | Difference <sup>c</sup> | Peak of linkage coordinate <sup>d</sup> | LOD score <sup>e</sup> | 2-LOD interval                  | Linkage type                   | Sanger/Illumina <sup>f</sup> |
|------------------------------------|---------------------------------------|----------------------|-----------------------|------------------------------|-----------------------|------------------------|-------------------------|-----------------------------------------|------------------------|---------------------------------|--------------------------------|------------------------------|
| <i>LOC100360843</i>                | chr1:76260384:+                       | 26                   | 69                    | -43                          | 50                    | 76                     | -26                     | chr1:80926785                           | 6.34                   | chr1:55981210-89159471          | <i>cis</i>                     | S                            |
| <i>LOC100360843</i>                | chr1:76260390:+                       | 21                   | 65                    | -44                          | 36                    | 76                     | -40                     | chr1:71780124                           | 8.06                   | chr1:55981210-89159471          | <i>cis</i>                     | S                            |
| <b><i>LOC100360843</i> average</b> | <b>chr1:76260305-76260666:+</b>       |                      |                       |                              | <b>43</b>             | <b>76</b>              | <b>-33</b>              | <b>chr1:71780124</b>                    | <b>8.70</b>            | <b>chr1:55981210-89159471</b>   | <b><i>cis</i></b>              | S                            |
| <i>Cast</i>                        | chr2:1577794:-                        | nd <sup>g</sup>      | nd                    | nd                           | 100                   | 1                      | 99                      | chr2:8864577                            | 9.62                   | chr2:0-13411541                 | <i>cis</i>                     | S                            |
| <i>Cast</i>                        | chr2:1577799:-                        | nd                   | nd                    | nd                           | 93                    | 1                      | 93                      | chr2:8864577                            | 10.30                  | chr2:0-13411541                 | <i>cis</i>                     | S                            |
| <i>Cast</i>                        | chr2:1577803:-                        | nd                   | nd                    | nd                           | 95                    | 1                      | 94                      | chr2:8864577                            | 11.05                  | chr2:0-13411541                 | <i>cis</i>                     | S                            |
| <i>Cast</i>                        | chr2:1577819:-                        | nd                   | nd                    | nd                           | 88                    | 1                      | 87                      | chr2:8864577                            | 12.91                  | chr2:0-13411541                 | <i>cis</i>                     | S                            |
| <i>Cast</i>                        | chr2:1577857:-                        | nd                   | nd                    | nd                           | 97                    | 2                      | 95                      | chr2:8864577                            | 12.29                  | chr2:0-13411541                 | <i>cis</i>                     | S                            |
| <i>Cast</i>                        | chr2:1577875:-                        | nd                   | nd                    | nd                           | 96                    | 7                      | 89                      | chr2:8864577                            | 12.18                  | chr2:0-13411541                 | <i>cis</i>                     | S                            |
| <i>Cast</i>                        | chr2:1577880:-                        | nd                   | nd                    | nd                           | 99                    | 4                      | 95                      | chr2:8864577                            | 12.41                  | chr2:0-13411541                 | <i>cis</i>                     | S                            |
| <i>Cast</i>                        | chr2:1577899:-                        | nd                   | nd                    | nd                           | 100                   | 2                      | 98                      | chr2:8864577                            | 12.51                  | chr2:0-13411541                 | <i>cis</i>                     | S                            |
| <i>Cast</i>                        | chr2:1577909:-                        | 90                   | 18                    | 72                           | 99                    | 2                      | 98                      | chr2:8864577                            | 12.50                  | chr2:0-13411541                 | <i>cis</i>                     | S                            |
| <i>Cast</i>                        | chr2:1577916:-                        | nd                   | nd                    | nd                           | 88                    | 2                      | 86                      | chr2:8864577                            | 12.78                  | chr2:0-13411541                 | <i>cis</i>                     | S                            |
| <i>Cast</i>                        | chr2:1577947:-                        | 100                  | 16                    | 84                           | 100                   | 15                     | 85                      | chr2:8864577                            | 12.20                  | chr2:0-13411541                 | <i>cis</i>                     | S                            |
| <b><i>Cast</i> average</b>         | <b>chr2:1577677-1577984:-</b>         |                      |                       |                              | <b>96</b>             | <b>3</b>               | <b>93</b>               | <b>chr2:8864577</b>                     | <b>12.57</b>           | <b>chr2:0-13411541</b>          | <b><i>cis</i></b>              | S                            |
| <i>Fam198b</i>                     | chr2:171370578:+                      | 61                   | 49                    | 12                           | 72                    | 58                     | 14                      | chr2:166553647                          | 8.81                   | chr2:164055359-172685103        | <i>cis</i>                     | S                            |
| <i>Fam198b</i>                     | chr2:171370584:+                      | 75                   | 52                    | 23                           | 80                    | 65                     | 15                      | chr2:166553647                          | 11.26                  | chr2:164055359-172685103        | <i>cis</i>                     | S                            |
| <i>Fam198b</i>                     | chr2:171370615:+                      | 76                   | 57                    | 19                           | 92                    | 74                     | 18                      | chr2:166553647                          | 12.22                  | chr2:164055359-172685103        | <i>cis</i>                     | S                            |
| <i>Fam198b</i>                     | chr2:171370624:+                      | 86                   | 58                    | 28                           | 90                    | 72                     | 17                      | chr2:166553647                          | 11.34                  | chr2:164055359-172685103        | <i>cis</i>                     | S                            |
| <b><i>Fam198b</i> average</b>      | <b>chr2:171370462-171370757:+</b>     |                      |                       |                              | <b>83</b>             | <b>67</b>              | <b>16</b>               | <b>chr2:166553647</b>                   | <b>13.87</b>           | <b>chr2:164055359-172685103</b> | <b><i>cis</i></b>              | S                            |
| <i>Odpf2</i>                       | chr3:8876367:+                        | 40                   | 60                    | -20                          | 73                    | 82                     | -9                      | chr2:82938235                           | 7.57                   | chr2:82818916-83039313          | <i>trans</i>                   | S                            |
| <i>Odpf2</i>                       | chr3:8876373:+                        | 29                   | 50                    | -21                          | 64                    | 77                     | -13                     | chr2:82938235                           | 5.79                   | chr2:82282002-83709691          | <i>trans</i>                   | S                            |
| <i>Odpf2</i>                       | chr3:8876382:+                        | 27                   | 46                    | -19                          | 61                    | 71                     | -10                     | chr2:82938235                           | 4.47                   | chr2:79300696-83709691          | <i>trans</i>                   | S                            |
| <i>Odpf2</i>                       | chr3:8876397:+                        | 37                   | 62                    | -25                          | 76                    | 85                     | -9                      | chr2:82938235                           | 5.05                   | chr2:79300696-83709691          | <i>trans</i>                   | S                            |
| <i>Odpf2</i>                       | chr3:8876402:+                        | 48                   | 73                    | -25                          | 84                    | 90                     | -6                      | chr2:82938235                           | 5.82                   | chr2:79300696-83709691          | <i>trans</i>                   | S                            |
| <i>Odpf2</i>                       | chr3:8876433:+                        | 41                   | 62                    | -21                          | 74                    | 84                     | -10                     | chr2:82938235                           | 3.59                   | chr2:75338743-83709691          | <i>trans</i>                   | S                            |
| <i>Odpf2</i>                       | chr3:8876480:+                        | 9                    | 14                    | -5                           | 39                    | 48                     | -9                      | chr2:82282002                           | 2.51                   | n/a <sup>h</sup>                | no signif linkage <sup>i</sup> | S                            |
| <i>Odpf2</i>                       | chr3:8876484:+                        | 10                   | 25                    | -15                          | 43                    | 55                     | -12                     | chr2:82282002                           | 2.27                   | n/a                             | no signif linkage              | S                            |
| <b><i>Odpf2</i> average</b>        | <b>chr3:8876123-8876785:+</b>         |                      |                       |                              | <b>72</b>             | <b>81</b>              | <b>-10</b>              | <b>chr2:82938235</b>                    | <b>6.10</b>            | <b>chr2:79300696-83039313</b>   | <b><i>trans</i></b>            | S                            |
| <i>Akr1b10</i>                     | chr4:61757643:+                       | 8                    | 8                     | 8                            | 22                    | 33                     | -12                     | chr17:39969064                          | 1.95                   | n/a                             | no signif linkage              | I                            |
| <i>Akr1b10</i>                     | chr4:61757653:+                       | 18                   | 18                    | 18                           | 16                    | 28                     | -12                     | chr17:28025480                          | 2.23                   | n/a                             | no signif linkage              | I                            |
| <i>Akr1b10</i>                     | chr4:61757680:+                       | 6                    | 29                    | -23                          | 9                     | 19                     | -10                     | chr15:54570481                          | 2.23                   | n/a                             | no signif linkage              | I                            |
| <i>Akr1b10</i>                     | chr4:61757702:+                       | 4                    | 4                     | 4                            | 9                     | 17                     | -8                      | chr17:24218005                          | 3.09                   | n/a                             | no signif linkage              | I                            |
| <i>Akr1b10</i>                     | chr4:61757723:+                       | 20                   | 20                    | 20                           | 32                    | 42                     | -11                     | chr4:64105027                           | 3.23                   | n/a                             | no signif linkage              | I                            |
| <i>Akr1b10</i>                     | chr4:61757729:+                       | 16                   | 16                    | 16                           | 27                    | 40                     | -13                     | chr1:237021546                          | 3.94                   | chr1:236899082-240673620        | <i>trans</i>                   | I                            |
| <b><i>Akr1b10</i> average</b>      | <b>chr4:61757621-61757753:+</b>       |                      |                       |                              | <b>19</b>             | <b>30</b>              | <b>-11</b>              | <b>chr4:63305380</b>                    | <b>2.91</b>            | <b>n/a</b>                      | <b>no signif linkage</b>       | I                            |
| <i>RGD1564053</i>                  | chr5:6849865:+                        | 21                   | 39                    | -18                          | 15                    | 34                     | -19                     | chr5:4525855                            | 6.83                   | chr5:1894554-7625963            | <i>cis</i>                     | I                            |
| <i>RGD1564053</i>                  | chr5:6849899:+                        | 66                   | 89                    | -23                          | 50                    | 81                     | -31                     | chr5:6419261                            | 9.57                   | chr5:1894554-13327089           | <i>cis</i>                     | I                            |
| <i>RGD1564053</i>                  | chr5:6849920:+                        | 73                   | 83                    | -10                          | 67                    | 73                     | -6                      | chr5:6419261                            | 2.16                   | n/a                             | no signif linkage              | I                            |
| <i>RGD1564053</i>                  | chr5:6849925:+                        | 96                   | 92                    | 4                            | 83                    | 81                     | 2                       | chr14:36607884                          | 2.06                   | n/a                             | no signif linkage              | I                            |
| <b><i>RGD1564053</i> average</b>   | <b>chr5:6849814-6849947:+</b>         |                      |                       |                              | <b>54</b>             | <b>67</b>              | <b>-13</b>              | <b>chr5:6419261</b>                     | <b>7.35</b>            | <b>chr5:1894554-13327089</b>    | <b><i>cis</i></b>              | I                            |
| <i>Nsmaf</i>                       | chr5:19887393:+                       | 73                   | 70                    | 3                            | 77                    | 65                     | 12                      | chr5:17516274                           | 4.87                   | chr5:14415906-24215534          | <i>cis</i>                     | I                            |
| <i>Nsmaf</i>                       | chr5:19887422:+                       | 64                   | 51                    | 13                           | 58                    | 53                     | 6                       | chr5:17516274                           | 4.20                   | chr5:4525855-24215534           | <i>cis</i>                     | I                            |
| <i>Nsmaf</i>                       | chr5:19887432:+                       | 74                   | 61                    | 13                           | 74                    | 54                     | 20                      | chr5:17516274                           | 8.05                   | chr5:16184249-24215534          | <i>cis</i>                     | I                            |
| <i>Nsmaf</i>                       | chr5:19887480:+                       | 60                   | 40                    | 20                           | 67                    | 51                     | 16                      | chr5:17516274                           | 11.22                  | chr5:16184249-20153421          | <i>cis</i>                     | I                            |
| <b><i>Nsmaf</i> average</b>        | <b>chr5:19887357-19887486:+</b>       |                      |                       |                              | <b>69</b>             | <b>56</b>              | <b>13</b>               | <b>chr5:17516274</b>                    | <b>11.67</b>           | <b>chr5:16184249-20153421</b>   | <b><i>cis</i></b>              | I                            |

|                           |                                   |    |    |     |           |           |            |                       |              |                                 |                          |          |
|---------------------------|-----------------------------------|----|----|-----|-----------|-----------|------------|-----------------------|--------------|---------------------------------|--------------------------|----------|
| <i>RGD1565350</i>         | chr5:62118122:+                   | 29 | 14 | 14  | 24        | 15        | 9          | chr5:56293047         | 3.93         | chr5:40389315-58060089          | <i>cis</i>               | I        |
| <i>RGD1565350</i>         | chr5:62118163:+                   | 61 | 40 | 21  | 63        | 39        | 25         | chr5:62039612         | 10.42        | chr5:61230757-64094065          | <i>cis</i>               | I        |
| <i>RGD1565350</i>         | chr5:62118183:+                   | 48 | 34 | 14  | 44        | 28        | 16         | chr5:62039612         | 12.43        | chr5:61230757-64094065          | <i>cis</i>               | I        |
| <i>RGD1565350</i>         | chr5:62118194:+                   | 50 | 38 | 12  | 43        | 30        | 13         | chr5:62039612         | 7.93         | chr5:61230757-64094065          | <i>cis</i>               | I        |
| <b>RGD1565350 average</b> | <b>chr5:62118077-62118218:+</b>   |    |    |     | <b>44</b> | <b>28</b> | <b>16</b>  | <b>chr5:62039612</b>  | <b>12.22</b> | <b>chr5:61230757-64094065</b>   | <b><i>cis</i></b>        | <b>I</b> |
| <i>Galnt12</i>            | chr5:63712047:+                   | 42 | 71 | -29 | 34        | 63        | -30        | chr5:62039612         | 7.53         | chr5:58060089-64694890          | <i>cis</i>               | I        |
| <i>Galnt12</i>            | chr5:63712080:+                   | 51 | 67 | -16 | 40        | 66        | -25        | chr5:64094065         | 4.77         | chr5:58060089-74190073          | <i>cis</i>               | I        |
| <i>Galnt12</i>            | chr5:63712088:+                   | 58 | 68 | -10 | 44        | 71        | -27        | chr5:62039612         | 7.62         | chr5:58501829-64094065          | <i>cis</i>               | I        |
| <i>Galnt12</i>            | chr5:63712117:+                   | 16 | 29 | -13 | 14        | 24        | -10        | chr5:62039612         | 3.04         | n/a                             | no signif linkage        | I        |
| <i>Galnt12</i>            | chr5:63712134:+                   | 34 | 67 | -33 | 35        | 63        | -28        | chr5:62039612         | 9.54         | chr5:58060089-64094065          | <i>cis</i>               | I        |
| <b>Galnt12 average</b>    | <b>chr5:63712033-63712186:+</b>   |    |    |     | <b>34</b> | <b>57</b> | <b>-24</b> | <b>chr5:62039612</b>  | <b>12.09</b> | <b>chr5:61230757-64094065</b>   | <b><i>cis</i></b>        | <b>I</b> |
| <i>F1M4B7_RAT</i>         | chr5:87563006:+                   | 59 | 33 | 26  | 54        | 27        | 27         | chr5:83313363         | 13.28        | chr5:83167847-88056807          | <i>cis</i>               | I        |
| <i>F1M4B7_RAT</i>         | chr5:87563013:+                   | 53 | 30 | 23  | 45        | 24        | 21         | chr5:83313363         | 12.80        | chr5:83167847-88056807          | <i>cis</i>               | I        |
| <i>F1M4B7_RAT</i>         | chr5:87563081:+                   | 86 | 53 | 33  | 82        | 44        | 38         | chr5:83313363         | 18.66        | chr5:83167847-88056807          | <i>cis</i>               | I        |
| <i>F1M4B7_RAT</i>         | chr5:87563083:+                   | 76 | 43 | 33  | 69        | 35        | 34         | chr5:83313363         | 14.20        | chr5:83167847-88056807          | <i>cis</i>               | I        |
| <b>F1M4B7_RAT average</b> | <b>chr5:87563005-87563150:+</b>   |    |    |     | <b>62</b> | <b>32</b> | <b>30</b>  | <b>chr5:83313363</b>  | <b>16.98</b> | <b>chr5:83167847-88056807</b>   | <b><i>cis</i></b>        | <b>I</b> |
| <i>Cdkn2b</i>             | chr5:108937537:+                  | 9  | 18 | -9  | 17        | 23        | -6         | chr5:108704737        | 4.24         | chr5:97254326-120148225         | <i>cis</i>               | I        |
| <i>Cdkn2b</i>             | chr5:108937541:+                  | 7  | 16 | -9  | 12        | 19        | -6         | chr5:108704737        | 3.89         | chr5:103285990-120148225        | <i>cis</i>               | I        |
| <i>Cdkn2b</i>             | chr5:108937609:+                  | 35 | 42 | -7  | 42        | 51        | -9         | chr1:234601040        | 2.10         | n/a                             | no signif linkage        | I        |
| <i>Cdkn2b</i>             | chr5:108937640:+                  | 15 | 41 | -26 | 24        | 36        | -12        | chr5:108704737        | 5.89         | chr5:106314352-119017376        | <i>cis</i>               | I        |
| <b>Cdkn2b average</b>     | <b>chr5:108937522-108937640:+</b> |    |    |     | <b>24</b> | <b>32</b> | <b>-8</b>  | <b>chr5:108704737</b> | <b>4.79</b>  | <b>chr5:106314352-119017376</b> | <b><i>cis</i></b>        | <b>I</b> |
| <i>Ttc22</i>              | chr5:127700274:+                  | 23 | 41 | -18 | 34        | 49        | -15        | chr5:127023735        | 6.54         | chr5:124763813-137473830        | <i>cis</i>               | S        |
| <i>Ttc22</i>              | chr5:127700277:+                  | 15 | 30 | -15 | 30        | 47        | -18        | chr5:127023735        | 6.24         | chr5:126790264-130615503        | <i>cis</i>               | S        |
| <i>Ttc22</i>              | chr5:127700328:+                  | 21 | 39 | -18 | 36        | 51        | -15        | chr5:127023735        | 5.75         | chr5:124763813-135115333        | <i>cis</i>               | S        |
| <i>Ttc22</i>              | chr5:127700333:+                  | 19 | 49 | -30 | 46        | 65        | -19        | chr5:127023735        | 4.05         | 124763813-141408867             | <i>cis</i>               | S        |
| <i>Ttc22</i>              | chr5:127700335:+                  | 31 | 56 | -25 | 59        | 77        | -18        | chr5:127023735        | 4.77         | chr5:124763813-137473830        | <i>cis</i>               | S        |
| <i>Ttc22</i>              | chr5:127700343:+                  | 30 | 70 | -40 | 61        | 74        | -13        | chr5:130615503        | 5.51         | chr5:124763813-136970505        | <i>cis</i>               | S        |
| <i>Ttc22</i>              | chr5:127700353:+                  | 33 | 58 | -25 | 63        | 76        | -13        | chr5:135115333        | 3.59         | n/a                             | no signif linkage        | S        |
| <i>Ttc22</i>              | chr5:127700355:+                  | 31 | 60 | -29 | 60        | 74        | -14        | chr5:127023735        | 5.81         | chr5:124763813-136072542        | <i>cis</i>               | S        |
| <b>Ttc22 average</b>      | <b>chr5:127700207-127700483:+</b> |    |    |     | <b>47</b> | <b>63</b> | <b>-16</b> | <b>chr5:127023735</b> | <b>7.19</b>  | <b>chr5:126790264-130615503</b> | <b><i>cis</i></b>        | <b>S</b> |
| <i>Slc2a1</i>             | chr5:139703426:+                  | 88 | 91 | -3  | 88        | 81        | 7          | chr4:51563781         | 1.73         | n/a                             | no signif linkage        | I        |
| <i>Slc2a1</i>             | chr5:139703437:+                  | 94 | 93 | 1   | 96        | 91        | 5          | chr5:147970080        | 2.29         | n/a                             | no signif linkage        | I        |
| <i>Slc2a1</i>             | chr5:139703480:+                  | 59 | 62 | -3  | 53        | 43        | 10         | chr4:51563781         | 1.88         | n/a                             | no signif linkage        | I        |
| <i>Slc2a1</i>             | chr5:139703549:+                  | 87 | 7  | 80  | 76        | 0         | 76         | chr5:137825190        | 31.98        | chr5:137473830-141408867        | <i>cis</i>               | I        |
| <b>Slc2a1 average</b>     | <b>chr5:139703426-139703584:+</b> |    |    |     | <b>78</b> | <b>54</b> | <b>24</b>  | <b>chr5:137825190</b> | <b>18.10</b> | <b>chr5:137473830-141408867</b> | <b><i>cis</i></b>        | <b>I</b> |
| <i>Rragc</i>              | chr5:143257694:+                  | 48 | 55 | -7  | 34        | 52        | -18        | chr5:143426944        | 4.30         | chr5:137473830-145136680        | <i>cis</i>               | I        |
| <i>Rragc</i>              | chr5:143257762:+                  | 48 | 67 | -19 | 38        | 54        | -16        | chr5:143426944        | 6.60         | chr5:137825190-145136680        | <i>cis</i>               | I        |
| <i>Rragc</i>              | chr5:143257789:+                  | 56 | 83 | -28 | 49        | 67        | -18        | chr5:141408867        | 8.18         | chr5:137825190-145136680        | <i>cis</i>               | I        |
| <i>Rragc</i>              | chr5:143257837:+                  | 51 | 69 | -18 | 48        | 72        | -24        | chr5:141408867        | 5.11         | chr5:137473830-145136680        | <i>cis</i>               | I        |
| <b>Rragc average</b>      | <b>chr5:143257694-143257854:+</b> |    |    |     | <b>42</b> | <b>61</b> | <b>-19</b> | <b>chr5:141408867</b> | <b>9.20</b>  | <b>chr5:137825190-145136680</b> | <b><i>cis</i></b>        | <b>I</b> |
| <i>Rragc</i>              | chr5:143573598:+                  | 31 | 64 | -33 | 25        | 63        | -37        | chr5:143426944        | 8.31         | chr5:141408867-145136680        | <i>cis</i>               | I        |
| <i>Rragc</i>              | chr5:143573621:+                  | 30 | 71 | -41 | 27        | 60        | -33        | chr5:143426944        | 8.86         | chr5:141408867-145136680        | <i>cis</i>               | I        |
| <i>Rragc</i>              | chr5:143573627:+                  | 60 | 94 | -33 | 51        | 84        | -34        | chr5:143426944        | 6.70         | chr5:141408867-145136680        | <i>cis</i>               | I        |
| <i>Rragc</i>              | chr5:143573649:+                  | 27 | 64 | -37 | 20        | 53        | -33        | chr5:143426944        | 7.32         | chr5:141408867-145136680        | <i>cis</i>               | I        |
| <i>Rragc</i>              | chr5:143573687:+                  | 41 | 75 | -33 | 38        | 72        | -34        | chr5:143426944        | 8.46         | chr5:141408867-145136680        | <i>cis</i>               | I        |
| <b>Rragc average</b>      | <b>chr5:143573578-143573701:+</b> |    |    |     | <b>32</b> | <b>66</b> | <b>-34</b> | <b>chr5:143426944</b> | <b>11.40</b> | <b>chr5:141408867-145136680</b> | <b><i>cis</i></b>        | <b>I</b> |
| <i>Epha2</i>              | chr5:160184557:+                  | 43 | 23 | 20  | 82        | 65        | 17         | chr5:159699655        | 5.96         | chr5:158655817-163883415        | <i>cis</i>               | S        |
| <i>Epha2</i>              | chr5:160184560:+                  | 43 | 22 | 21  | 77        | 55        | 23         | chr5:159699655        | 9.85         | chr5:159338084-163883415        | <i>cis</i>               | S        |
| <i>Epha2</i>              | chr5:160184634:+                  | 41 | 57 | -16 | 63        | 81        | -18        | chr5:159699655        | 9.39         | chr5:159338084-163883415        | <i>cis</i>               | S        |
| <b>Epha2 average</b>      | <b>chr5:160184417-160184704:+</b> |    |    |     | <b>74</b> | <b>67</b> | <b>7</b>   | <b>chr20:2931904</b>  | <b>2.38</b>  | <b>n/a</b>                      | <b>no signif linkage</b> | <b>S</b> |

|                           |                                   |    |    |     |           |           |            |                       |              |                                 |                          |   |
|---------------------------|-----------------------------------|----|----|-----|-----------|-----------|------------|-----------------------|--------------|---------------------------------|--------------------------|---|
| <i>Tmem178</i>            | chr6:3892309:+                    | 32 | 85 | -53 | 31        | 67        | -37        | chr6:3837300          | 17.72        | chr6:270828-5001565             | <i>cis</i>               |   |
| <i>Tmem178</i>            | chr6:3892344:+                    | 30 | 88 | -59 | 25        | 60        | -35        | chr6:3837300          | 15.16        | chr6:270828-5001565             | <i>cis</i>               |   |
| <i>Tmem178</i>            | chr6:3892374:+                    | 29 | 71 | -42 | 24        | 54        | -30        | chr6:3837300          | 11.70        | chr6:270828-5001565             | <i>cis</i>               |   |
| <i>Tmem178</i>            | chr6:3892397:+                    | 38 | 88 | -49 | 23        | 56        | -33        | chr6:3837300          | 15.19        | chr6:270828-5001565             | <i>cis</i>               |   |
| <i>Tmem178</i>            | chr6:3892406:+                    | 44 | 79 | -36 | 26        | 57        | -31        | chr6:3837300          | 17.81        | chr6:270828-5001565             | <i>cis</i>               |   |
| <i>Tmem178</i>            | chr6:3892412:+                    | 18 | 44 | -26 | 12        | 29        | -16        | chr6:3837300          | 8.44         | chr6:270828-5001565             | <i>cis</i>               |   |
| <b>Tmem178 average</b>    | <b>chr6:3892290-3892428:+</b>     |    |    |     | <b>24</b> | <b>54</b> | <b>-30</b> | <b>chr6:3837300</b>   | <b>17.98</b> | <b>chr6:270828-5001565</b>      | <b><i>cis</i></b>        |   |
| <i>Asap2</i>              | chr6:41745653:+                   | 88 | 91 | -3  | 78        | 83        | -4         | chr11:82046320        | 3.11         | n/a                             | no signif linkage        |   |
| <i>Asap2</i>              | chr6:41745660:+                   | 94 | 95 | -1  | 68        | 65        | 3          | chr6:115004085        | 3.10         | n/a                             | no signif linkage        |   |
| <i>Asap2</i>              | chr6:41745686:+                   | 67 | 90 | -22 | 69        | 91        | -22        | chr6:40832900         | 6.32         | chr6:38837057-44677919          | <i>cis</i>               |   |
| <i>Asap2</i>              | chr6:41745719:+                   | 85 | 90 | -5  | 89        | 82        | 7          | chr8:43888617         | 2.58         | n/a                             | no signif linkage        |   |
| <b>Asap2 average</b>      | <b>chr6:41745647-41745769:+</b>   |    |    |     | <b>76</b> | <b>80</b> | <b>-4</b>  | <b>chr1:249360014</b> | <b>4.88</b>  | <b>chr1:240992368-252871262</b> | <b><i>trans</i></b>      |   |
| <i>F1LUN1_RAT</i>         | chr6:59772079:+                   | 73 | 50 | 23  | 79        | 53        | 26         | chr6:56831273         | 12.94        | chr6:53530806-65742462          | <i>cis</i>               |   |
| <i>F1LUN1_RAT</i>         | chr6:59772113:+                   | 92 | 65 | 27  | 94        | 68        | 27         | chr6:56831273         | 14.72        | chr6:53530806-65742462          | <i>cis</i>               |   |
| <i>F1LUN1_RAT</i>         | chr6:59772118:+                   | 89 | 61 | 28  | 95        | 64        | 31         | chr6:56831273         | 12.49        | chr6:53530806-65742462          | <i>cis</i>               |   |
| <i>F1LUN1_RAT</i>         | chr6:59772129:+                   | 87 | 63 | 24  | 93        | 69        | 24         | chr6:56831273         | 11.81        | chr6:53530806-65742462          | <i>cis</i>               |   |
| <i>F1LUN1_RAT</i>         | chr6:59772153:+                   | 90 | 80 | 9   | 91        | 74        | 16         | chr6:56831273         | 6.80         | chr6:53530806-69173770          | <i>cis</i>               |   |
| <b>F1LUN1_RAT average</b> | <b>chr6:59772063-59772192:+</b>   |    |    |     | <b>90</b> | <b>66</b> | <b>25</b>  | <b>chr6:56831273</b>  | <b>14.46</b> | <b>chr6:53530806-65742462</b>   | <b><i>cis</i></b>        |   |
| <i>Map4k5</i>             | chr6:91976035:+                   | nd | nd | nd  | 35        | 63        | -28        | chr6:86088639         | 18.59        | chr6:80603661-92298609          | <i>cis</i>               | S |
| <i>Map4k5</i>             | chr6:91976050:+                   | nd | nd | nd  | 15        | 52        | -37        | chr6:86088639         | 22.47        | chr6:80603661-92298609          | <i>cis</i>               | S |
| <i>Map4k5</i>             | chr6:91976119:+                   | 17 | 56 | -38 | 22        | 77        | -55        | chr6:86088639         | 12.15        | chr6:80603661-92298609          | <i>cis</i>               | S |
| <b>Map4k5 average</b>     | <b>chr6:91975954-91976205:+</b>   |    |    |     | <b>24</b> | <b>64</b> | <b>-40</b> | <b>chr6:86088639</b>  | <b>23.28</b> | <b>chr6:80603661-92298609</b>   | <b><i>cis</i></b>        | S |
| <i>Snapc1</i>             | chr6:96511559:+                   | 10 | 21 | -12 | 11        | 23        | -12        | chr6:93310927         | 4.54         | chr6:86088639-104870403         | <i>cis</i>               |   |
| <i>Snapc1</i>             | chr6:96511617:+                   | 5  | 12 | -7  | 9         | 17        | -8         | chr14:13776720        | 2.61         | n/a                             | no signif linkage        |   |
| <i>Snapc1</i>             | chr6:96511637:+                   | 7  | 29 | -22 | 9         | 25        | -16        | chr6:93310927         | 4.45         | chr6:80603661-104870403         | <i>cis</i>               |   |
| <i>Snapc1</i>             | chr6:96511668:+                   | 25 | 39 | -14 | 31        | 57        | -26        | chr6:93310927         | 9.39         | chr6:92298609-97966119          | <i>cis</i>               |   |
| <b>Snapc1 average</b>     | <b>chr6:96511512-96511670:+</b>   |    |    |     | <b>15</b> | <b>30</b> | <b>-16</b> | <b>chr6:93310927</b>  | <b>9.64</b>  | <b>chr6:92298609-98679608</b>   | <b><i>cis</i></b>        |   |
| <i>F1M804_RAT</i>         | chr6:98659102:+                   | 55 | 64 | -9  | 44        | 45        | -1         | chr2:242410458        | 3.25         | n/a                             | no signif linkage        |   |
| <i>F1M804_RAT</i>         | chr6:98659149:+                   | 83 | 78 | 5   | 70        | 63        | 6          | chr6:6778779          | 2.67         | n/a                             | no signif linkage        |   |
| <i>F1M804_RAT</i>         | chr6:98659194:+                   | 85 | 38 | 46  | 77        | 23        | 55         | chr6:98679608         | 18.50        | chr6:97966119-98698763          | <i>cis</i>               |   |
| <i>F1M804_RAT</i>         | chr6:98659199:+                   | 75 | 82 | -7  | 68        | 64        | 4          | chr3:103249862        | 2.83         | n/a                             | no signif linkage        |   |
| <b>F1M804_RAT average</b> | <b>chr6:98659081-98659233:+</b>   |    |    |     | <b>65</b> | <b>49</b> | <b>16</b>  | <b>chr6:98679608</b>  | <b>5.17</b>  | <b>chr6:93310927-104870403</b>  | <b><i>cis</i></b>        |   |
| <i>Bcl11b</i>             | chr6:132185613:+                  | 50 | 74 | -24 | 46        | 61        | -14        | chr6:131897632        | 4.23         | chr6:129241985-144480901        | <i>cis</i>               |   |
| <i>Bcl11b</i>             | chr6:132185695:+                  | 20 | 52 | -32 | 14        | 42        | -28        | chr6:131897632        | 10.39        | chr6:129241985-132699487        | <i>cis</i>               |   |
| <i>Bcl11b</i>             | chr6:132185717:+                  | 29 | 56 | -28 | 32        | 49        | -17        | chr6:131897632        | 3.31         | n/a                             | no signif linkage        |   |
| <b>Bcl11b average</b>     | <b>chr6:132185611-132185763:+</b> |    |    |     | <b>31</b> | <b>51</b> | <b>-20</b> | <b>chr6:131897632</b> | <b>10.36</b> | <b>chr6:129241985-132699487</b> | <b><i>cis</i></b>        |   |
| <i>Ppp1r13b</i>           | chr6:136693323:+                  | 44 | 70 | -26 | 37        | 69        | -31        | chr6:132699487        | 9.63         | chr6:129241985-144480901        | <i>cis</i>               |   |
| <i>Ppp1r13b</i>           | chr6:136693329:+                  | 83 | 74 | 9   | 70        | 62        | 8          | chr6:132699487        | 5.15         | chr6:129241985-144480901        | <i>cis</i>               |   |
| <i>Ppp1r13b</i>           | chr6:136693343:+                  | 38 | 31 | 7   | 36        | 25        | 12         | chr6:132699487        | 7.25         | chr6:131897632-141539352        | <i>cis</i>               |   |
| <i>Ppp1r13b</i>           | chr6:136693363:+                  | 70 | 61 | 9   | 69        | 52        | 17         | chr6:132699487        | 5.13         | chr6:128853105-145193067        | <i>cis</i>               |   |
| <i>Ppp1r13b</i>           | chr6:136693388:+                  | 40 | 40 | 0   | 37        | 33        | 3          | chr6:132699487        | 5.14         | chr6:129241985-144480901        | <i>cis</i>               |   |
| <i>Ppp1r13b</i>           | chr6:136693396:+                  | 85 | 86 | -1  | 76        | 76        | 0          | chr19:2708374         | 2.30         | n/a                             | no signif linkage        |   |
| <i>Ppp1r13b</i>           | chr6:136693419:+                  | 87 | 91 | -4  | 82        | 82        | 0          | chr16:45349355        | 3.15         | n/a                             | no signif linkage        |   |
| <i>Ppp1r13b</i>           | chr6:136693436:+                  | 80 | 76 | 4   | 76        | 76        | 0          | chr1:90431156         | 2.45         | n/a                             | no signif linkage        |   |
| <b>Ppp1r13b average</b>   | <b>chr6:136693300-136693442:+</b> |    |    |     | <b>60</b> | <b>59</b> | <b>1</b>   | <b>chr6:132699487</b> | <b>3.34</b>  | <b>n/a</b>                      | <b>no signif linkage</b> |   |
| <i>Fgd6</i>               | chr7:31169450:+                   | 91 | 84 | 7   | 91        | 84        | 7          | chr7:30134941         | 3.89         | n/a                             | no signif linkage        |   |
| <i>Fgd6</i>               | chr7:31169505:+                   | 88 | 77 | 11  | 73        | 64        | 9          | chr7:30134941         | 4.19         | chr7:22107933-32221040          | <i>cis</i>               |   |
| <i>Fgd6</i>               | chr7:31169556:+                   | 70 | 48 | 21  | 66        | 57        | 10         | chr7:30134941         | 5.40         | chr7:22107933-32221040          | <i>cis</i>               |   |
| <b>Fgd6 average</b>       | <b>chr7:31169443-31169556:+</b>   |    |    |     | <b>77</b> | <b>68</b> | <b>9</b>   | <b>chr7:30134941</b>  | <b>6.46</b>  | <b>chr7:22107933-32221040</b>   | <b><i>cis</i></b>        |   |

|                                  |                                   |    |    |     |           |           |            |                       |              |                                 |                          |   |
|----------------------------------|-----------------------------------|----|----|-----|-----------|-----------|------------|-----------------------|--------------|---------------------------------|--------------------------|---|
| <i>Tbc1d30</i>                   | chr7:60595192:+                   | 31 | 27 | 4   | 40        | 33        | 8          | chr7:60397471         | 5.50         | chr7:60128525-72623825          | <i>cis</i>               | I |
| <i>Tbc1d30</i>                   | chr7:60595202:+                   | 35 | 36 | -1  | 43        | 39        | 5          | chr2:153116666        | 3.01         | n/a                             | no signif linkage        | I |
| <i>Tbc1d30</i>                   | chr7:60595204:+                   | 20 | 25 | -5  | 27        | 34        | -7         | chr6:9974757          | 2.62         | n/a                             | no signif linkage        | I |
| <i>Tbc1d30</i>                   | chr7:60595224:+                   | 24 | 26 | -2  | 20        | 33        | -13        | chr2:149178695        | 2.06         | n/a                             | no signif linkage        | I |
| <i>Tbc1d30</i>                   | chr7:60595233:+                   | 32 | 1  | 32  | 38        | 29        | 9          | chr2:159881070        | 3.19         | n/a                             | no signif linkage        | I |
| <i>Tbc1d30</i>                   | chr7:60595253:+                   | 40 | 35 | 5   | 43        | 62        | -20        | chr7:60128525         | 6.55         | chr7:51368543-61371130          | <i>cis</i>               | I |
| <i>Tbc1d30</i>                   | chr7:60595274:+                   | 40 | 34 | 6   | 45        | 60        | -15        | chr7:60128525         | 8.07         | chr7:51368543-61371130          | <i>cis</i>               | I |
| <i>Tbc1d30</i>                   | chr7:60595314:+                   | 32 | 24 | 8   | 41        | 48        | -7         | chr7:60128525         | 3.56         | n/a                             | no signif linkage        | I |
| <i>Tbc1d30</i>                   | chr7:60595335:+                   | 14 | 10 | 4   | 22        | 26        | -4         | chr3:164374674        | 2.33         | n/a                             | no signif linkage        | I |
| <i>Tbc1d30</i>                   | chr7:60595351:+                   | 4  | 6  | -2  | 13        | 13        | 0          | chr19:43368611        | 2.23         | n/a                             | no signif linkage        | I |
| <b><i>Tbc1d30</i> average</b>    | <b>chr7:60595191-60595353:+</b>   |    |    |     | <b>33</b> | <b>38</b> | <b>-4</b>  | <b>chr7:41970847</b>  | <b>2.95</b>  | <b>n/a</b>                      | <b>no signif linkage</b> | I |
| <i>Nsmce2</i>                    | chr7:96296512:+                   | 92 | 89 | 3   | 73        | 60        | 13         | chr15:94925958        | 2.43         | n/a                             | no signif linkage        | I |
| <i>Nsmce2</i>                    | chr7:96296572:+                   | 84 | 88 | -4  | 90        | 78        | 13         | chr7:94054636         | 3.58         | n/a                             | no signif linkage        | I |
| <i>Nsmce2</i>                    | chr7:96296599:+                   | 58 | 35 | 23  | 50        | 31        | 19         | chr7:94054636         | 10.32        | chr7:92129202-98093741          | <i>cis</i>               | I |
| <i>Nsmce2</i>                    | chr7:96296618:+                   | 94 | 78 | 16  | 92        | 91        | 1          | chr20:34084707        | 2.29         | n/a                             | no signif linkage        | I |
| <b><i>Nsmce2</i> average</b>     | <b>chr7:96296486-96296639:+</b>   |    |    |     | <b>76</b> | <b>65</b> | <b>11</b>  | <b>chr7:94054636</b>  | <b>9.49</b>  | <b>chr7:92129202-98093741</b>   | <b><i>cis</i></b>        | I |
| <i>Ly6e</i>                      | chr7:113120800:+                  | 2  | 77 | -75 | 11        | 70        | -59        | chr7:113865618        | 7.37         | chr7:106541122-114437124        | <i>cis</i>               | S |
| <i>Ly6e</i>                      | chr7:113120876:+                  | 19 | 44 | -25 | 16        | 62        | -45        | chr7:108819248        | 8.08         | chr7:106541122-113865618        | <i>cis</i>               | S |
| <i>Ly6e</i>                      | chr7:113120938:+                  | 2  | 15 | -13 | 0         | 49        | -49        | chr7:108819248        | 9.00         | chr7:106541122-113865618        | <i>cis</i>               | S |
| <b><i>Ly6e</i> average</b>       | <b>chr7:113120765-113121068:+</b> |    |    |     | <b>9</b>  | <b>60</b> | <b>-51</b> | <b>chr7:108819248</b> | <b>9.61</b>  | <b>chr7:106541122-114437124</b> | <b><i>cis</i></b>        | S |
| <i>Naprt1</i>                    | chr7:113868517:-                  | 5  | 29 | -24 | 14        | 53        | -39        | chr7:113865618        | 4.39         | chr7:106541122-114437124        | <i>cis</i>               | S |
| <i>Naprt1</i>                    | chr7:113868460:-                  | 2  | 42 | -40 | 10        | 53        | -43        | chr7:113865618        | 12.68        | chr7:108819248-114437124        | <i>cis</i>               | S |
| <i>Naprt1</i>                    | chr7:113868451:-                  | 11 | 30 | -19 | 16        | 70        | -55        | chr7:113865618        | 12.98        | chr7:108819248-114437124        | <i>cis</i>               | S |
| <i>Naprt1</i>                    | chr7:113868449:-                  | 7  | 23 | -16 | 10        | 54        | -44        | chr7:113865618        | 12.55        | chr7:108819248-114437124        | <i>cis</i>               | S |
| <i>Naprt1</i>                    | chr7:113868442:-                  | 13 | 34 | -21 | 14        | 67        | -53        | chr7:113865618        | 10.16        | chr7:108819248-114437124        | <i>cis</i>               | S |
| <i>Naprt1</i>                    | chr7:113868436:-                  | 15 | 32 | -17 | 36        | 75        | -39        | chr7:113865618        | 9.77         | chr7:108819248-114437124        | <i>cis</i>               | S |
| <b><i>Naprt1</i> average</b>     | <b>chr7:113868322-113868588:-</b> |    |    |     | <b>17</b> | <b>62</b> | <b>-46</b> | <b>chr7:113865618</b> | <b>9.77</b>  | <b>chr7:108819248-114437124</b> | <b><i>cis</i></b>        | S |
| <i>E9PSL5_RAT</i>                | chr7:116060485:+                  | 28 | 53 | -25 | 29        | 52        | -24        | chr7:114437124        | 8.35         | chr7:113865618-122635137        | <i>cis</i>               | I |
| <i>E9PSL5_RAT</i>                | chr7:116060555:+                  | 66 | 78 | -12 | 58        | 72        | -14        | chr7:117007096        | 6.44         | chr7:108819248-125417420        | <i>cis</i>               | I |
| <i>E9PSL5_RAT</i>                | chr7:116060590:+                  | 86 | 91 | -5  | 86        | 87        | -1         | chr5:141408867        | 2.50         | n/a                             | no signif linkage        | I |
| <i>E9PSL5_RAT</i>                | chr7:116060597:+                  | 79 | 78 | 1   | 74        | 85        | -11        | chr9:4289268          | 3.25         | n/a                             | no signif linkage        | I |
| <b><i>E9PSL5_RAT</i> average</b> | <b>chr7:116060462-116060604:+</b> |    |    |     | <b>62</b> | <b>74</b> | <b>-12</b> | <b>chr7:114437124</b> | <b>7.76</b>  | <b>chr7:108819248-121883064</b> | <b><i>cis</i></b>        | I |
| <i>Nfam1</i>                     | chr7:121018647:+                  | 86 | 77 | 9   | 77        | 64        | 13         | chr7:114437124        | 4.48         | chr7:100067811-128152751        | <i>cis</i>               | I |
| <i>Nfam1</i>                     | chr7:121018653:+                  | 87 | 83 | 4   | 73        | 60        | 14         | chr7:117555752        | 2.60         | n/a                             | no signif linkage        | I |
| <i>Nfam1</i>                     | chr7:121018720:+                  | 60 | 33 | 27  | 64        | 37        | 27         | chr7:117555752        | 10.13        | chr7:117007096-121842583        | <i>cis</i>               | I |
| <i>Nfam1</i>                     | chr7:121018752:+                  | 75 | 46 | 29  | 66        | 51        | 15         | chr7:117555752        | 7.10         | chr7:117007096-121883510        | <i>cis</i>               | I |
| <i>Nfam1</i>                     | chr7:121018772:+                  | 80 | 55 | 25  | 84        | 53        | 31         | chr7:117555752        | 13.11        | chr7:117007096-121842583        | <i>cis</i>               | I |
| <b><i>Nfam1</i> average</b>      | <b>chr7:121018632-121018780:+</b> |    |    |     | <b>73</b> | <b>53</b> | <b>20</b>  | <b>chr7:117555752</b> | <b>13.84</b> | <b>chr7:117007096-121711167</b> | <b><i>cis</i></b>        | I |
| <i>F1M9Y3_RAT</i>                | chr7:13508204:+                   | 2  | 23 | -21 | 2         | 32        | -30        | chr7:10417532         | 16.97        | chr7:10072378-13886210          | <i>cis</i>               | I |
| <i>F1M9Y3_RAT</i>                | chr7:13508226:+                   | 2  | 15 | -13 | 1         | 27        | -26        | chr7:10417532         | 11.99        | chr7:10072378-13886210          | <i>cis</i>               | I |
| <i>F1M9Y3_RAT</i>                | chr7:13508243:+                   | 2  | 21 | -19 | 3         | 33        | -30        | chr7:10417532         | 13.50        | chr7:10072378-13886210          | <i>cis</i>               | I |
| <i>F1M9Y3_RAT</i>                | chr7:13508247:+                   | 3  | 27 | -24 | 3         | 39        | -37        | chr7:10417532         | 16.33        | chr7:10072378-13886210          | <i>cis</i>               | I |
| <i>F1M9Y3_RAT</i>                | chr7:13508251:+                   | 2  | 23 | -21 | 3         | 35        | -31        | chr7:10417532         | 14.45        | chr7:10072378-13886210          | <i>cis</i>               | I |
| <i>F1M9Y3_RAT</i>                | chr7:13508299:+                   | 4  | 29 | -25 | 2         | 35        | -34        | chr7:10417532         | 14.94        | chr7:10072378-13886210          | <i>cis</i>               | I |
| <b><i>F1M9Y3_RAT</i> average</b> | <b>chr7:13508194-13508311:+</b>   |    |    |     | <b>2</b>  | <b>33</b> | <b>-31</b> | <b>chr7:10417532</b>  | <b>15.70</b> | <b>chr7:10072378-13886210</b>   | <b><i>cis</i></b>        | I |
| <i>LOC100365068</i>              | chr7:135196747:+                  | 81 | 57 | 24  | 84        | 61        | 24         | chr7:135435079        | 8.35         | chr7:134894183-139323661        | <i>cis</i>               | I |
| <i>LOC100365068</i>              | chr7:135196761:+                  | 91 | 60 | 31  | 80        | 58        | 23         | chr7:135435079        | 11.33        | chr7:134894183-139323661        | <i>cis</i>               | I |
| <i>LOC100365068</i>              | chr7:135196785:+                  | 93 | 65 | 28  | 88        | 62        | 26         | chr7:135435079        | 10.83        | chr7:134894183-139323661        | <i>cis</i>               | I |
| <i>LOC100365068</i>              | chr7:135196787:+                  | 92 | 65 | 27  | 87        | 63        | 24         | chr7:135435079        | 9.76         | chr7:134894183-139323661        | <i>cis</i>               | I |

|                             |                                   |    |    |     |           |           |            |                                                               |              |                                 |                          |          |
|-----------------------------|-----------------------------------|----|----|-----|-----------|-----------|------------|---------------------------------------------------------------|--------------|---------------------------------|--------------------------|----------|
| <i>LOC100365068</i>         | chr7:135196791:+                  | 89 | 62 | 27  | 84        | 55        | 29         | chr7:135435079                                                | 10.02        | chr7:134894183-139323661        | <i>cis</i>               | I        |
| <i>LOC100365068</i>         | chr7:135196795:+                  | 90 | 66 | 25  | 89        | 63        | 27         | chr7:135435079                                                | 11.37        | chr7:134894183-139323661        | <i>cis</i>               | I        |
| <i>LOC100365068</i>         | chr7:135196802:+                  | 86 | 60 | 26  | 82        | 59        | 22         | chr7:135435079                                                | 10.80        | chr7:134894183-139323661        | <i>cis</i>               | I        |
| <i>LOC100365068</i>         | chr7:135196840:+                  | 71 | 44 | 28  | 62        | 48        | 14         | chr7:135435079                                                | 5.63         | chr7:134894183-139323661        | <i>cis</i>               | I        |
| <i>LOC100365068</i>         | chr7:135196887:+                  | 75 | 45 | 30  | 69        | 54        | 15         | chr7:135435079                                                | 8.48         | chr7:134894183-139323661        | <i>cis</i>               | I        |
| <i>LOC100365068</i>         | chr7:135196895:+                  | 77 | 51 | 26  | 81        | 55        | 25         | chr7:135435079                                                | 9.42         | chr7:134894183-139323661        | <i>cis</i>               | I        |
| <b>LOC100365068 average</b> | <b>chr7:135196738-135196895:+</b> |    |    |     | <b>81</b> | <b>58</b> | <b>23</b>  | <b>chr7:135435079</b>                                         | <b>10.79</b> | <b>chr7:134894183-139323661</b> | <b><i>cis</i></b>        | <b>I</b> |
| <i>BI1_RAT</i>              | chr7:138157743:+                  | 35 | 76 | -41 | 14        | 28        | -15        | chr4:115063428                                                | 3.64         | n/a                             | no signif linkage        | I        |
| <i>BI1_RAT</i>              | chr7:138157753:+                  | 22 | 22 | 22  | 18        | 33        | -15        | chr1:205671704                                                | 2.15         | n/a                             | no signif linkage        | I        |
| <i>BI1_RAT</i>              | chr7:138157862:+                  | 5  | 8  | -3  | 9         | 19        | -10        | chr2:256707794                                                | 1.66         | n/a                             | no signif linkage        | I        |
| <i>BI1_RAT</i>              | chr7:138157866:+                  | 6  | 11 | -5  | 11        | 24        | -13        | chr9:67866953                                                 | 3.57         | n/a                             | no signif linkage        | I        |
| <b>BI1_RAT average</b>      | <b>chr7:138157743-138157866:+</b> |    |    |     | <b>13</b> | <b>26</b> | <b>-13</b> | <b>chr6:37984850</b>                                          | <b>4.08</b>  | <b>n/a</b>                      | <b>no signif linkage</b> | <b>I</b> |
| <i>Krt4</i>                 | chr7:140634138:-                  | 86 | 36 | 50  | 95        | 81        | 14         | chr7:141354287                                                | 11.03        | chr7:135435079-143002779        | <i>cis</i>               | S        |
| <i>Krt4</i>                 | chr7:140634155:-                  | 88 | 33 | 55  | 94        | 76        | 19         | chr7:141354287                                                | 11.58        | chr7:139538952-141594453        | <i>cis</i>               | S        |
| <i>Krt4</i>                 | chr7:140634165:-                  | 90 | 39 | 51  | 95        | 79        | 16         | chr7:141354287                                                | 13.65        | chr7:139538952-141594453        | <i>cis</i>               | S        |
| <i>Krt4</i>                 | chr7:140634192:-                  | 82 | 27 | 55  | 86        | 53        | 33         | chr7:141354287                                                | 13.33        | chr7:139538952-143002779        | <i>cis</i>               | S        |
| <i>Krt4</i>                 | chr7:140634198:-                  | 73 | 21 | 52  | 87        | 51        | 36         | chr7:141354287                                                | 14.16        | chr7:139538952-141594453        | <i>cis</i>               | S        |
| <i>Krt4</i>                 | chr7:140634213:-                  | 73 | 30 | 43  | 88        | 60        | 27         | chr7:141354287                                                | 13.16        | chr7:139538952-143002779        | <i>cis</i>               | S        |
| <i>Krt4</i>                 | chr7:140634215:-                  | 70 | 34 | 36  | 89        | 66        | 23         | chr7:141354287                                                | 14.32        | chr7:139538952-141594453        | <i>cis</i>               | S        |
| <i>Krt4</i>                 | chr7:140634224:-                  | 74 | 25 | 49  | 84        | 56        | 27         | chr7:141354287                                                | 12.02        | chr7:139538952-143002779        | <i>cis</i>               | S        |
| <i>Krt4</i>                 | chr7:140634256:-                  | 81 | 27 | 54  | 84        | 53        | 31         | chr7:141354287                                                | 16.44        | chr7:139538952-141594453        | <i>cis</i>               | S        |
| <i>Krt4</i>                 | chr7:140634295:-                  | 93 | 81 | 12  | 99        | 92        | 6          | chr7:141354287                                                | 7.12         | chr7:134894183-143002779        | <i>cis</i>               | S        |
| <i>Krt4</i>                 | chr7:140634316:-                  | 88 | 59 | 29  | 90        | 77        | 13         | chr7:141354287                                                | 13.50        | chr7:139538952-141594453        | <i>cis</i>               | S        |
| <i>Krt4</i>                 | chr7:140634324:-                  | 87 | 61 | 26  | 84        | 73        | 11         | chr7:141354287                                                | 11.97        | chr7:139538952-143002779        | <i>cis</i>               | S        |
| <b>Krt4 average</b>         | <b>chr7:140634112-140634395:-</b> |    |    |     | <b>89</b> | <b>68</b> | <b>21</b>  | <b>chr7:141354287</b>                                         | <b>14.62</b> | <b>chr7:139538952-141594453</b> | <b><i>cis</i></b>        | <b>S</b> |
| <i>Ccdc96</i>               | chr14:79858821:-                  | 66 | 7  | 59  | 68        | 27        | 41         | chr14:78866840,<br>chr14:80263250,<br>chr14:83340812          | 12.12        | chr14:77232950-84045063         | <i>cis</i>               | S        |
| <i>Ccdc96</i>               | chr14:79858801:-                  | 73 | 7  | 66  | 80        | 29        | 51         | chr14:78866840,<br>chr14:80263250,<br>chr14:83340812          | 14.47        | chr14:77232950-84045063         | <i>cis</i>               | S        |
| <i>Ccdc96</i>               | chr14:79858798:-                  | 71 | 8  | 63  | 78        | 31        | 47         | chr14:78866840,<br>chr14:80263250,<br>chr14:83340812          | 13.33        | chr14:77232950-84045063         | <i>cis</i>               | S        |
| <i>Ccdc96</i>               | chr14:79858790:-                  | 76 | 6  | 70  | 83        | 29        | 54         | chr14:78866840,<br>chr14:80263250,<br>chr14:83340812          | 14.59        | chr14:77232950-84045063         | <i>cis</i>               | S        |
| <i>Ccdc96</i>               | chr14:79858766:-                  | 65 | 5  | 60  | 81        | 30        | 51         | chr14:78866840,<br>chr14:80263250,<br>chr14:83340812          | 14.49        | chr14:77232950-84045063         | <i>cis</i>               | S        |
| <b>Ccdc96 average</b>       | <b>chr14:79858556-79858886:-</b>  |    |    |     | <b>78</b> | <b>29</b> | <b>49</b>  | <b>chr14:78866840,<br/>chr14:80263250,<br/>chr14:83340812</b> | <b>14.21</b> | <b>chr14:77232950-84045063</b>  | <b><i>cis</i></b>        | <b>S</b> |
| <i>Ddhd1</i>                | chr15:21569719:-                  | 58 | 80 | -22 | 79        | 87        | -8         | chr15:17009597                                                | 3.08         | n/a                             | no signif linkage        | S        |
| <i>Ddhd1</i>                | chr15:21569766:-                  | 26 | 59 | -33 | 47        | 74        | -28        | chr15:21493194                                                | 10.84        | chr15:21046469-22822009         | <i>cis</i>               | S        |
| <i>Ddhd1</i>                | chr15:21569816:-                  | 48 | 66 | -18 | 53        | 63        | -10        | chr15:21493194                                                | 3.79         | n/a                             | no signif linkage        | S        |
| <i>Ddhd1</i>                | chr15:21569826:-                  | 52 | 74 | -22 | 53        | 68        | -15        | chr15:21493194                                                | 6.14         | chr15:21046469-22822009         | <i>cis</i>               | S        |
| <i>Ddhd1</i>                | chr15:21569898:-                  | 61 | 74 | -13 | 68        | 74        | -7         | chr7:117555752                                                | 1.82         | n/a                             | no signif linkage        | S        |
| <b>Ddhd1 average</b>        | <b>chr15:21569685-21570002:-</b>  |    |    |     | <b>50</b> | <b>71</b> | <b>-21</b> | <b>chr15:21493194</b>                                         | <b>10.37</b> | <b>chr15:21046469-22822009</b>  | <b><i>cis</i></b>        | <b>S</b> |
| <i>Cbln1</i>                | chr19:20944468:+                  | 13 | 57 | -44 | 20        | 63        | -43        | chr19:21144074                                                | 8.74         | chr19:15280687-29813557         | <i>cis</i>               | S        |
| <i>Cbln1</i>                | chr19:20944480:+                  | 17 | 33 | -16 | 23        | 66        | -43        | chr19:16528440,<br>chr19:21481304                             | 9.93         | chr19:15280687-26511523         | <i>cis</i>               | S        |

|                             |                                  |    |    |     |           |           |            |                       |              |                                |                          |          |
|-----------------------------|----------------------------------|----|----|-----|-----------|-----------|------------|-----------------------|--------------|--------------------------------|--------------------------|----------|
| <i>Cbln1</i>                | chr19:20944486:+                 | 13 | 80 | -67 | 29        | 72        | -43        | chr19:21144074        | 8.52         | chr19:15280687-29813557        | <i>cis</i>               | S        |
| <i>Cbln1</i>                | chr19:20944494:+                 | 26 | 37 | -11 | 24        | 67        | -44        | chr19:21144074        | 10.29        | chr19:15280687-26511523        | <i>cis</i>               | S        |
| <i>Cbln1</i>                | chr19:20944514:+                 | 10 | 37 | -27 | 18        | 64        | -46        | chr19:21144074        | 10.94        | chr19:15280687-26511523        | <i>cis</i>               | S        |
| <i>Cbln1</i>                | chr19:20944536:+                 | 17 | 64 | -47 | 24        | 67        | -43        | chr19:21144074        | 10.22        | chr19:15280687-26511523        | <i>cis</i>               | S        |
| <i>Cbln1</i>                | chr19:20944576:+                 | 9  | 20 | -11 | 3         | 27        | -24        | chr19:21144074        | 16.22        | chr19:15280687-26511523        | <i>cis</i>               | S        |
| <i>Cbln1</i>                | chr19:20944624:+                 | 0  | 34 | -34 | 15        | 58        | -43        | chr19:21144074        | 11.15        | chr19:15280687-26511523        | <i>cis</i>               | S        |
| <b><i>Cbln1</i> average</b> | <b>chr19:20944355-20944663:+</b> |    |    |     | <b>19</b> | <b>61</b> | <b>-41</b> | <b>chr19:21144074</b> | <b>11.50</b> | <b>chr19:15280687-26511523</b> | <b><i>cis</i></b>        | <b>S</b> |
| <i>Grm4</i>                 | chr20:5655482:-                  | 62 | 39 | 23  | 89        | 73        | 16         | chr20:2931904         | 14.20        | chr20:0-6999342                | <i>cis</i>               | S        |
| <i>Grm4</i>                 | chr20:5655411:-                  | 43 | 19 | 24  | 73        | 49        | 24         | chr20:2931904         | 7.37         | chr20:0-6999342                | <i>cis</i>               | S        |
| <i>Grm4</i>                 | chr20:5655375:-                  | 32 | 12 | 20  | 77        | 40        | 37         | chr20:2931904         | 12.75        | chr20:0-6999342                | <i>cis</i>               | S        |
| <b><i>Grm4</i> average</b>  | <b>chr20:5655243-5655528:-</b>   |    |    |     | <b>80</b> | <b>54</b> | <b>26</b>  | <b>chr20:2931904</b>  | <b>13.57</b> | <b>chr20:0-6999342</b>         | <b><i>cis</i></b>        | <b>S</b> |
| <i>Rtdr1</i>                | chr20:14187239:+                 | 9  | 9  | 9   | 11        | 18        | -8         | chr5:126790264        | 2.38         | n/a                            | no signif linkage        | I        |
| <i>Rtdr1</i>                | chr20:14187266:+                 | 8  | 44 | -36 | 5         | 7         | -2         | chr17:70462220        | 2.09         | n/a                            | no signif linkage        | I        |
| <i>Rtdr1</i>                | chr20:14187282:+                 | 8  | 41 | -33 | 9         | 9         | 0          | chr6:52768463         | 2.58         | n/a                            | no signif linkage        | I        |
| <i>Rtdr1</i>                | chr20:14187284:+                 | 9  | 42 | -33 | 8         | 11        | -3         | chr9:53822255         | 2.34         | n/a                            | no signif linkage        | I        |
| <i>Rtdr1</i>                | chr20:14187310:+                 | 11 | 21 | -10 | 8         | 7         | 1          | chr6:52768463         | 2.93         | n/a                            | no signif linkage        | I        |
| <i>Rtdr1</i>                | chr20:14187345:+                 | 7  | 17 | -10 | 11        | 13        | -2         | chr19:47704959        | 1.90         | n/a                            | no signif linkage        | I        |
| <i>Rtdr1</i>                | chr20:14187371:+                 | 17 | 24 | -7  | 17        | 18        | -2         | chr9:10303064         | 3.04         | n/a                            | no signif linkage        | I        |
| <b><i>Rtdr1</i> average</b> | <b>chr20:14187231-14187390:+</b> |    |    |     | <b>10</b> | <b>12</b> | <b>-2</b>  | <b>chr6:50926188</b>  | <b>1.87</b>  | <b>n/a</b>                     | <b>no signif linkage</b> | <b>I</b> |

a) Name of the gene closest to the measured CpGs,

b) WGBS = whole genome bisulfite sequencing, methylation percentage in BN and SHR strains, or difference between the strains (BN-SHR),

c) BN, SHR and difference indicate percentages and difference in BN and SHR methylation (BN-SHR) determined by Illumina or Sanger sequencing,

d) multiple peak of linkage coordinates are listed when they all have the same LOD score,

e) LOD score indicates the LOD score at the peak of linkage, for individual CpG dinucleotides and for average CpG methylation across the entire amplicon,

f) linkage data was generated by conventional PCR and Sanger sequencing (S) or by amplification using the Fluidigm platform followed by Illumina sequencing (I),

g) nd = no data in the WGBS data set of 10,614,445 sampled CpG dinucleotides,

h) n/a = not applicable,

i) no significant linkage, defined as  $P > 0.05$  after a minimum of 1000 permutations of the linkage data

**Bold type indicates the average methylation data for each amplicon**
