# Supplementary material for: Genetic Analysis of the Cardiac Methylome at Single Nucleotide Resolution in a Model of Human Cardiovascular Disease
Source: PubMed Central journal article supplement (PMC4256262; doi:10.1371/journal.pgen.1004813), 2014-12-04
Supplement: pgen.1004813.s017.pdf [file pgen.1004813.s017.pdf]

**Table S4 *Trans* meth-QTL interval genes***Odfp2*

| Gene type               | Number in 2-<br>LOD interval | Number detected<br>in RNA-seq data<br>set | Number that are<br>differentially<br>expressed | Number containing non-<br>synonymous variants or<br>SNPs <sup>a</sup> |
|-------------------------|------------------------------|-------------------------------------------|------------------------------------------------|-----------------------------------------------------------------------|
| microRNAs               | 0                            | n/a <sup>b</sup>                          | n/a                                            | n/a                                                                   |
| miscellaneous RNAs      | 2                            | No reads obtained                         | n/a                                            | 1                                                                     |
| protein coding<br>genes | 7                            | 7                                         | 3                                              | 4                                                                     |
| pseudogenes             | 1                            | 1                                         | 0                                              | 0                                                                     |
| rRNAs                   | 0                            | n/a                                       | n/a                                            | n/a                                                                   |
| snoRNAs                 | 2                            | No reads obtained                         | n/a                                            | 0                                                                     |
| snRNAs                  | 1                            | No reads obtained                         | n/a                                            | 1                                                                     |
| <b>Total</b>            | <b>13</b>                    | <b>8</b>                                  | <b>3</b>                                       | <b>6</b>                                                              |

*Asap2*

| Gene type            | Number in 2-<br>LOD interval | Number detected in<br>RNA-seq data set | Number that are<br>differentially<br>expressed | Number containing non-<br>synonymous variants or SNPs <sup>a</sup> |
|----------------------|------------------------------|----------------------------------------|------------------------------------------------|--------------------------------------------------------------------|
| microRNAs            | 4                            | 2                                      | 1                                              | 2                                                                  |
| miscellaneous RNAs   | 2                            | No reads obtained                      | n/a                                            | 2                                                                  |
| protein coding genes | 157                          | 131                                    | 64                                             | 44                                                                 |
| pseudogenes          | 2                            | 1                                      | 0                                              | 0                                                                  |
| rRNAs                | 4                            | 2                                      | 0                                              | 0                                                                  |
| snoRNAs              | 4                            | 2                                      | 0                                              | 1                                                                  |
| snRNAs               | 10                           | 1                                      | 0                                              | 0                                                                  |
| <b>Total</b>         | <b>183</b>                   | <b>139</b>                             | <b>65</b>                                      | <b>49</b>                                                          |

a) Non-synonymous variants in protein coding genes, (SNPs) Single nucleotide polymorphisms in non-protein coding genes.

b) (n/a) not available
