# Supplementary material for: Genetic Analysis of the Cardiac Methylome at Single Nucleotide Resolution in a Model of Human Cardiovascular Disease
Source: PubMed Central journal article supplement (PMC4256262; doi:10.1371/journal.pgen.1004813), 2014-12-04
Supplement: pgen.1004813.s018.pdf [file pgen.1004813.s018.pdf]

**Table S5 Read mapping statistics for RNA-seq reads generated in BN and SHR rats**

| Sample           | Total Reads        | Mapped Reads       |           | Detected Exons |           | Detected Genes |           |
|------------------|--------------------|--------------------|-----------|----------------|-----------|----------------|-----------|
|                  |                    |                    | [%]       |                | [%]       |                | [%]       |
| BN5              | 87,000,686         | 56,508,044         | 65        | 170,778        | 71        | 18,698         | 63        |
| BN6              | 85,210,074         | 54,082,224         | 63        | 169,036        | 70        | 18,425         | 62        |
| BN7              | 73,689,476         | 45,607,749         | 62        | 173,223        | 72        | 18,900         | 64        |
| BN8              | 62,604,648         | 39,425,162         | 63        | 167,558        | 69        | 18,155         | 62        |
| <b>BN total</b>  | <b>308,504,884</b> | <b>195,623,179</b> | <b>63</b> | <b>186,194</b> | <b>77</b> | <b>20,425</b>  | <b>69</b> |
| SHR5             | 74,538,102         | 46,332,951         | 62        | 170,851        | 71        | 18,390         | 62        |
| SHR6             | 85,211,922         | 53,195,586         | 62        | 172,716        | 71        | 18,586         | 63        |
| SHR7             | 65,158,566         | 40,842,670         | 63        | 168,057        | 70        | 18,101         | 61        |
| SHR8             | 80,868,854         | 51,062,549         | 63        | 172,903        | 72        | 18,599         | 63        |
| <b>SHR total</b> | <b>305,777,444</b> | <b>191,433,756</b> | <b>63</b> | <b>186,133</b> | <b>77</b> | <b>20,281</b>  | <b>69</b> |

Summary of the number of reads obtained for each sample and the percentage of reads mapped to the genome sequence (RGSC3.4 reference assembly) and the number and percentage of exons/genes (Ensembl 62) detected by mapped reads.
