# Supplementary material for: Genetic Analysis of the Cardiac Methylome at Single Nucleotide Resolution in a Model of Human Cardiovascular Disease
Source: PubMed Central journal article supplement (PMC4256262; doi:10.1371/journal.pgen.1004813), 2014-12-04
Supplement: pgen.1004813.s019.pdf [file pgen.1004813.s019.pdf]

**Table S6 Summary of the results of a two-way ANOVA to test for independence of methylation levels and the two factors strain and cell/tissue type**

| Amplicon Name | Amplicon Coordinates       | CpGs Measured | P(strain) <sup>a</sup> | P(tissue) <sup>a</sup> |
|---------------|----------------------------|---------------|------------------------|------------------------|
| Akr1b10       | chr4:61757621-61757753:+   | 6             | 4.35E-03 *             | 6.78E-06 ***           |
| Asap2         | chr6:41745647-41745769:+   | 4             | 5.14E-02 *             | 9.51E-01 -             |
| Bcl11b        | chr6:132185611-132185763:+ | 3             | 4.38E-03 *             | 9.12E-01 -             |
| Bl1_RAT       | chr7:138157743-138157866:+ | 4             | 2.64E-02 *             | 8.06E-04 **            |
| Cdkn2b        | chr5:108937522-108937640:+ | 5             | 2.13E-01 -             | 5.97E-01 -             |
| E9PSL5_RAT    | chr7:116060462-116060604:+ | 4             | 2.36E-01 -             | 9.94E-01 -             |
| F1LUN1_RAT    | chr6:59772063-59772192:+   | 5             | 1.02E-09 ***           | 9.47E-02 *             |
| F1M4B7_RAT    | chr5:87563005-87563150:+   | 4             | 7.05E-07 ***           | 2.24E-01 -             |
| F1M804_RAT    | chr6:98659081-98659233:+   | 5             | 3.26E-01 -             | 9.08E-01 -             |
| F1M9Y3_RAT    | chr7:13508194-13508311:+   | 7             | 6.17E-29 ***           | 1.80E-03 *             |
| Fgd6          | chr7:31169443-31169556:+   | 3             | 1.56E-01 -             | 9.05E-01 -             |
| Krt4          | chr7:140634112-140634395:+ | 8             | 2.17E-36 ***           | 2.67E-01 -             |
| LOC100365068  | chr7:135196738-135196895:+ | 10            | 7.49E-18 ***           | 3.73E-01 -             |
| Nfam1         | chr7:121018632-121018780:+ | 6             | 1.60E-04 **            | 7.77E-01 -             |
| Nsmaf         | chr5:19887357-19887486:+   | 4             | 5.51E-03 *             | 8.92E-01 -             |
| Nsmce2        | chr7:96296486-96296639:+   | 5             | 3.64E-02 *             | 9.98E-01 -             |
| Ppp1r13b      | chr6:136693300-136693442:+ | 8             | 1.00E+00 -             | 9.85E-01 -             |
| RGD1564053    | chr5:6849814-6849947:+     | 4             | 1.20E-01 -             | 9.40E-01 -             |
| RGD1565350    | chr5:62118077-62118218:+   | 10            | 9.39E-01 -             | 1.81E-01 -             |
| Rragc         | chr5:143257694-143257854:+ | 5             | 7.76E-05 ***           | 3.98E-01 -             |
| Rragc_2       | chr5:143573578-143573701:+ | 5             | 9.40E-06 ***           | 7.85E-01 -             |
| Rtdr1         | chr20:14187231-14187390:+  | 7             | 2.16E-02 *             | 3.13E-02 *             |
| Slc2a1        | chr5:139703426-139703584:+ | 4             | 4.59E-02 *             | 9.44E-01 -             |
| Snapc1        | chr6:96511512-96511670:+   | 4             | 1.39E-02 *             | 9.07E-01 -             |
| Tbc1d30       | chr7:60595191-60595353:+   | 10            | 8.89E-01 -             | 7.31E-03 *             |
| Tmem178       | chr6:3892290-3892428:+     | 7             | 1.49E-03 *             | 2.12E-01 -             |

a) Significance codes: \*\*\*\* P < 0.0001, \*\*\* P < 0.001, \*\* P < 0.05, \* P < 0.1, ' ' P >= 0.1.
