# Supplementary material for: Genetic Analysis of the Cardiac Methylome at Single Nucleotide Resolution in a Model of Human Cardiovascular Disease
Source: PubMed Central journal article supplement (PMC4256262; doi:10.1371/journal.pgen.1004813), 2014-12-04
Supplement: pgen.1004813.s020.pdf [file pgen.1004813.s020.pdf]

**Table S7 Comparison of position frequency matrices of nucleotides associated with hyper- and hypomethylated CpGs in rat and mouse**

| <b>Query Matrix</b> | <b>Target Matrix</b>  | <b>Query Consensus</b> | <b>Target Consensus</b> | <b>P-value</b> |
|---------------------|-----------------------|------------------------|-------------------------|----------------|
| Rat Hypomethylated  | Mouse Hypomethylated  | ATACACGTGTAT           | AAACACGTGTAT            | 2.76E-10       |
| Rat Hypermethylated | Mouse Hypermethylated | GCGTGCGCACGC           | GCGTGCGCACGC            | 1.06E-10       |
| Rat Hypomethylated  | Mouse Hypermethylated | ATACACGTGTAT           | GCGTGCGCACGC            | 7.65E-01       |
| Rat Hypermethylated | Mouse Hypomethylated  | GCGTGCGCACGC           | AAACACGTGTAT            | 9.48E-01       |
