# Supplementary material for: Genetic Analysis of the Cardiac Methylome at Single Nucleotide Resolution in a Model of Human Cardiovascular Disease
Source: PubMed Central journal article supplement (PMC4256262; doi:10.1371/journal.pgen.1004813), 2014-12-04
Supplement: pgen.1004813.s022.pdf [file pgen.1004813.s022.pdf]

Table S9 Summary of genomic regions showing parent-of-origin specific differences in methylation<sup>a</sup>

| #  | Chr | Start [bp]  | End [bp]    | Region Size [bp] | CGI <sup>b</sup> | TSS <sup>c</sup> | Exonic | Intronic | Intergenic <sup>d</sup> | Gene ID             | Gene Name | CpGs In Region | CpGs Analysed  |                |                 |                | CpGs Significantly Differentially Methylated |                |                 |                | Mean Methylation Difference Across Region [%] |                |                 |                | Max. Mean Methylation Difference [%] | Allele Showing Increased Methylation <sup>e</sup> |                |                 |                |                |                 |                |                 |
|----|-----|-------------|-------------|------------------|------------------|------------------|--------|----------|-------------------------|---------------------|-----------|----------------|----------------|----------------|-----------------|----------------|----------------------------------------------|----------------|-----------------|----------------|-----------------------------------------------|----------------|-----------------|----------------|--------------------------------------|---------------------------------------------------|----------------|-----------------|----------------|----------------|-----------------|----------------|-----------------|
|    |     |             |             |                  |                  |                  |        |          |                         |                     |           |                | BN Chromosomes |                | SHR Chromosomes |                | BN Chromosomes                               |                | SHR Chromosomes |                | BN Chromosomes                                |                | SHR Chromosomes |                |                                      | BN Chromosomes                                    |                | SHR Chromosomes |                | BN Chromosomes | SHR Chromosomes | BN Chromosomes | SHR Chromosomes |
|    |     |             |             |                  |                  |                  |        |          |                         |                     |           |                | Forward Strand | Reverse Strand | Forward Strand  | Reverse Strand | Forward Strand                               | Reverse Strand | Forward Strand  | Reverse Strand | Forward Strand                                | Reverse Strand | Forward Strand  | Reverse Strand |                                      | Forward Strand                                    | Reverse Strand | Forward Strand  | Reverse Strand |                |                 |                |                 |
| 1  | 1   | 7,882,907   | 7,883,212   | 306              | +                | +                |        |          |                         | ENSRNOG000000025587 | Plagl1    | 30             | 0              | 0              | 28              | 0              | 0                                            | 0              | 28              | 0              | 0                                             | 0              | 98              | -              | -                                    | 98                                                | -              | -               | M              | -              | -               |                |                 |
| 2  | 3   | 165,214,162 | 165,214,636 | 475              | +                | +                |        |          |                         | ENSRNOG000000025889 | GNAS3_RAT | 34             | 27             | 27             | 0               | 0              | 27                                           | 16             | 0               | 0              | 97                                            | 97             | -               | -              | 97                                   | P                                                 | P              | -               | -              | -              |                 |                |                 |
| 3  | 1   | 202,827,298 | 202,827,575 | 278              | +                |                  | +      |          |                         | -                   | -         | 16             | 10             | 10             | 0               | 13             | 5                                            | 10             | 0               | 13             | 94                                            | 68             | -               | 51             | 94                                   | P                                                 | P              | -               | -              | P              |                 |                |                 |
| 4  | 14  | 92,910,245  | 92,910,575  | 331              | +                | +                |        |          |                         | ENSRNOG000000004290 | Grb10     | 39             | 15             | 15             | 38              | 38             | 14                                           | 5              | 33              | 38             | 84                                            | 83             | 89              | 93             | 83                                   | M                                                 | M              | M               | M              | M              |                 |                |                 |
| 5  | 7   | 110,540,579 | 110,542,198 | 1,510            | +                |                  | +      |          |                         | ENSRNOG000000027569 | Trappc9   | 74             | 24             | 24             | 13              | 0              | 22                                           | 0              | 11              | 0              | 88                                            | 91             | 79              | -              | 91                                   | P                                                 | P              | P               | -              | -              |                 |                |                 |
| 6  | 1   | 202,828,927 | 202,829,773 | 847              | +                |                  |        |          |                         | -                   | -         | 1              | 0              | 0              | 0               | 1              | 0                                            | 0              | 0               | 1              | -                                             | -              | -               | 86             | 86                                   | -                                                 | -              | -               | -              | P              |                 |                |                 |
| 7  | 7   | 131,720,145 | 131,720,145 | 1                |                  |                  |        |          |                         | -                   | -         | 2              | 0              | 0              | 2               | 0              | 0                                            | 0              | 2               | 0              | -                                             | -              | -               | 86             | 86                                   | -                                                 | -              | -               | -              | M              |                 |                |                 |
| 8  | 7   | 110,542,698 | 110,542,705 | 8                | +                |                  |        |          |                         | ENSRNOG000000027569 | Trappc9   | 7              | 7              | 7              | 4               | 0              | 7                                            | 0              | 4               | 0              | 85                                            | -              | 81              | -              | 85                                   | P                                                 | -              | P               | -              | -              |                 |                |                 |
| 9  | 1   | 202,828,176 | 202,828,269 | 94               | +                |                  |        |          |                         | -                   | -         | 15             | 15             | 15             | 6               | 0              | 15                                           | 0              | 6               | 0              | 80                                            | -              | 67              | -              | 80                                   | P                                                 | -              | P               | -              | -              |                 |                |                 |
| 10 | 6   | 134,118,057 | 134,118,457 | 401              | +                |                  |        |          |                         | NR_027652           | Meg3      | 5              | 5              | 5              | 4               | 0              | 5                                            | 0              | 4               | 0              | 76                                            | -              | 76              | -              | 76                                   | P                                                 | -              | P               | -              | -              |                 |                |                 |
| 11 | 9   | 61,924,058  | 61,924,152  | 95               |                  |                  |        |          |                         | -                   | -         | 17             | 4              | 6              | 0               | 3              | 2                                            | 6              | 0               | 3              | 64                                            | 37             | -               | 73             | 64                                   | P                                                 | P              | -               | -              | P              |                 |                |                 |
| 12 | 9   | 61,942,510  | 61,943,368  | 859              | +                |                  |        |          |                         | -                   | -         | 7              | 7              | 7              | 2               | 0              | 6                                            | 0              | 0               | 0              | 72                                            | -              | 40              | -              | 72                                   | P                                                 | -              | P               | -              | -              |                 |                |                 |
| 13 | 8   | 94,777,428  | 94,777,580  | 153              |                  |                  |        |          |                         | -                   | -         | 1              | 1              | 1              | 1               | 0              | 1                                            | 0              | 0               | 70             | -                                             | 12             | -               | 70             | P                                    | -                                                 | P              | -               | -              |                |                 |                |                 |
| 14 | 2   | 144,587,430 | 144,587,430 | 1                |                  |                  |        |          |                         | -                   | -         | 1              | 0              | 0              | 1               | 0              | 0                                            | 0              | 1               | 0              | -                                             | -              | 69              | -              | 69                                   | -                                                 | -              | -               | M              | -              | -               |                |                 |
| 15 | 14  | 103,657,709 | 103,657,709 | 1                | +                | +                |        |          |                         | ENSRNOG00000009281  | Commd1    | 1              | 0              | 0              | 1               | 0              | 0                                            | 0              | 1               | 0              | -                                             | -              | 69              | -              | 69                                   | -                                                 | -              | -               | M              | -              | -               |                |                 |
| 16 | 3   | 160,066,888 | 160,067,025 | 138              |                  |                  |        |          |                         | -                   | -         | 11             | 11             | 11             | 11              | 7              | 10                                           | 0              | 11              | 0              | 35                                            | 52             | 35              | 69             | 69                                   | M                                                 | M              | M               | M              | M              |                 |                |                 |
| 17 | 8   | 94,766,769  | 94,766,769  | 1                |                  |                  |        |          |                         | -                   | -         | 1              | 0              | 1              | 0               | 1              | 0                                            | 1              | 0               | 1              | -                                             | 68             | -               | 45             | 68                                   | -                                                 | -              | P               | -              | -              |                 |                |                 |
| 18 | 8   | 109,556,004 | 109,556,004 | 1                |                  |                  |        |          |                         | -                   | -         | 1              | 1              | 1              | 0               | 0              | 1                                            | 0              | 0               | 0              | 68                                            | -              | -               | -              | 68                                   | M                                                 | -              | -               | -              | -              |                 |                |                 |
| 19 | 9   | 61,921,110  | 61,921,492  | 383              |                  |                  |        |          |                         | -                   | -         | 8              | 8              | 8              | 3               | 0              | 7                                            | 0              | 3               | 0              | 65                                            | -              | 67              | -              | 67                                   | P                                                 | -              | -               | -              | -              |                 |                |                 |
| 20 | 3   | 89,680,758  | 89,680,758  | 1                |                  |                  |        |          |                         | -                   | -         | 1              | 0              | 0              | 0               | 0              | 0                                            | 0              | 0               | 0              | -                                             | -              | 66              | -              | 66                                   | -                                                 | -              | -               | M              | -              | -               |                |                 |
| 21 | 8   | 94,782,149  | 94,782,430  | 282              |                  |                  |        |          |                         | -                   | -         | 8              | 0              | 0              | 0               | 5              | 0                                            | 7              | 0               | 5              | -                                             | 39             | -               | 66             | 66                                   | -                                                 | -              | P               | -              | -              |                 |                |                 |
| 22 | 9   | 61,925,095  | 61,925,565  | 471              |                  |                  |        |          |                         | -                   | -         | 9              | 9              | 9              | 8               | 0              | 4                                            | 0              | 7               | 0              | 49                                            | -              | 65              | -              | 65                                   | P                                                 | -              | -               | -              | -              |                 |                |                 |
| 23 | 20  | 4,748,306   | 4,748,306   | 1                |                  |                  |        |          |                         | -                   | -         | 1              | 1              | 1              | 0               | 0              | 1                                            | 0              | 0               | 0              | 64                                            | -              | -               | -              | 64                                   | P                                                 | -              | -               | -              | -              |                 |                |                 |
| 25 | 3   | 153,811,885 | 153,812,253 | 369              | +                | +                |        |          |                         | ENSRNOG00000007044  | L3mbtl1   | 15             | 6              | 6              | 15              | 9              | 6                                            | 3              | 9               | 0              | 46                                            | 64             | 44              | 32             | 64                                   | M                                                 | M              | M               | M              | M              |                 |                |                 |
| 27 | 1   | 202,825,223 | 202,825,540 | 318              | +                | +                |        |          |                         | ENSRNOG000000020367 | Mir675    | 12             | 0              | 12             | 0               | 10             | 0                                            | 12             | 0               | 9              | -                                             | 61             | -               | 55             | 61                                   | -                                                 | -              | P               | -              | -              | -               |                |                 |
| 28 | 9   | 61,944,112  | 61,944,891  | 580              |                  |                  |        |          |                         | -                   | -         | 15             | 13             | 13             | 7               | 0              | 12                                           | 0              | 7               | 0              | 44                                            | -              | 59              | -              | 59                                   | P                                                 | -              | -               | -              | -              |                 |                |                 |
| 29 | 13  | 68,353,604  | 68,353,604  | 1                |                  |                  |        |          |                         | ENSRNOG00000002680  | Lamc1     | 1              | 0              | 1              | 0               | 0              | 0                                            | 1              | 0               | 0              | -                                             | 58             | -               | -              | -                                    | 58                                                | -              | -               | M              | -              | -               |                |                 |
| 31 | 17  | 21,987,909  | 21,987,909  | 1                | +                |                  |        |          |                         | -                   | -         | 1              | 0              | 0              | 0               | 1              | 0                                            | 0              | 0               | 1              | -                                             | 25             | -               | 57             | 57                                   | -                                                 | -              | P               | -              | -              | -               |                |                 |
| 33 | 8   | 94,767,563  | 94,767,570  | 8                |                  |                  |        |          |                         | -                   | -         | 3              | 0              | 0              | 0               | 3              | 0                                            | 0              | 0               | 3              | -                                             | -              | -               | 57             | 57                                   | -                                                 | -              | -               | -              | M              |                 |                |                 |
| 35 | 3   | 127,615,693 | 127,615,693 | 1                |                  |                  |        |          |                         | -                   | -         | 1              | 1              | 1              | 1               | 0              | 1                                            | 0              | 0               | 0              | 55                                            | -              | 29              | -              | 55                                   | P                                                 | -              | -               | -              | -              |                 |                |                 |
| 41 | 6   | 134,055,793 | 134,055,804 | 12               |                  |                  |        |          |                         | -                   | -         | 2              | 2              | 2              | 2               | 2              | 2                                            | 0              | 0               | 0              | 52                                            | -              | 33              | 13             | 52                                   | P                                                 | -              | -               | -              | -              |                 |                |                 |
| 42 | 19  | 39,281,737  | 39,281,739  | 3                | +                |                  |        |          |                         | -                   | -         | 2              | 2              | 2              | 2               | 2              | 0                                            | 2              | 0               | 0              | 33                                            | 52             | 6               | 26             | 52                                   | M                                                 | M              | M               | M              | M              |                 |                |                 |
| 43 | 6   | 134,043,873 | 134,044,038 | 166              | +                |                  |        |          |                         | -                   | -         | 8              | 8              | 8              | 8               | 0              | 3                                            | 0              | 0               | 0              | 51                                            | -              | 25              | -              | 51                                   | P                                                 | -              | -               | -              | -              |                 |                |                 |
| 44 | 1   | 23,480,272  | 23,480,364  | 93               | +                |                  |        |          |                         | -                   | -         | 12             | 10             | 10             | 9               | 9              | 3                                            | 0              | 0               | 0              | 50                                            | -              | 26              | 9              | 50                                   | M                                                 | -              | -               | -              | -              | M               |                |                 |
| 45 | 4   | 202,918,734 | 202,919,023 | 290              | +                |                  |        |          |                         | -                   | -         | 4              | 4              | 4              | 3               | 0              | 4                                            | 0              | 3               | 0              | 50                                            | -              | 50              | -              | 50                                   | P                                                 | -              | -               | -              | -              |                 |                |                 |
| 46 | 9   | 61,920,167  | 61,920,305  | 139              | +                |                  |        |          |                         | -                   | -         | 3              | 3              | 3              | 0               | 0              | 0                                            | 0              | 2               | 0              | 21                                            | -              | 49              | -              | 49                                   | P                                                 | -              | -               | -              | -              |                 |                |                 |
| 47 | 1   | 84,804,885  | 84,804,885  | 1                |                  |                  |        |          |                         | ENSRNOG000000042096 | Zfp30     | 1              | 0              | 0              | 0               | 1              | 0                                            | 0              | 0               | 1              | -                                             | -              | -               | 49             | 49                                   | -                                                 | -              | -               | -              | M              | -               | -              |                 |
| 48 | 20  | 4,901,463   | 4,901,647   | 185              |                  |                  |        |          |                         | -                   | -         | 8              | 5              | 5              | 8               | 0              | 4                                            | 0              | 0               | 0              | 49                                            | -              | 13              | -              | 49                                   | M                                                 | -              | -               | -              | -              |                 |                |                 |
| 55 | 3   | 5,591,183   | 5,591,183   | 1                |                  |                  |        |          |                         | ENSRNOG000000032782 | Abo       | 1              | 0              | 1              | 0               | 0              | 0                                            | 1              | 0               | 0              | -                                             | 45             | -               | -              | -                                    | 45                                                | -              | -               | M              | -              | -               |                |                 |
| 56 | 14  | 92,700,847  | 92,700,847  | 1                | +                |                  |        |          |                         | ENSRNOG000000004372 | Ddc       | 1              | 1              | 1              | 1               | 0              | 1                                            | 0              | 0               | 0              | 45                                            | -              | 17              | -              | 45                                   | M                                                 | -              | -               | -              | -              |                 |                |                 |
| 60 | 14  | 93,055,005  | 93,055,005  | 1                |                  |                  |        |          |                         | -                   | -         | 1              | 1              | 1              | 1               | 0              | 0                                            | 0              | 0               | 1              | 43                                            | -              | 44              | -              | 44                                   | M                                                 | -              | -               | -              | -              |                 |                |                 |
| 61 | 4   | 65,562,379  | 65,562,395  | 17               | +                |                  |        |          |                         | ENSRNOG000000013378 | Svopl     | 2              | 0              | 0              | 0               | 2              | 0                                            | 0              | 0               | 2              | -                                             | 31             | -               | 44             | 44                                   | -                                                 | -              | M               | -              | -              | -               |                |                 |
| 63 | 1   | 112,729,274 | 112,729,274 | 1                |                  |                  |        |          |                         | -                   | -         | 1              | 0              | 0              | 1               | 0              | 0                                            | 0              | 1               | 0              | -                                             | 6              | -               | 43             | 43                                   | -                                                 | -              | P               | -              | -              | -               |                |                 |
| 64 | 8   | 46,339,335  | 46,339,335  | 1                |                  |                  |        |          |                         | -                   | -         | 1              | 1              | 1              | 1               | 0              | 1                                            | 0              | 0               | 0              | 43                                            | -              | 5               | -              | 43                                   | M                                                 | -              | -               | -              | -              |                 |                |                 |
| 65 | 5   | 151,870,240 | 151,870,409 | 170              | +                |                  |        |          |                         | ENSRNOG00000008600  | Sytl1     | 8              | 0              | 8              | 0               | 8              | 0                                            | 7              | 0               | 1              | -                                             | 43             | -               | 20             | 43                                   | -                                                 | -              | M               | -              | -              | -               | M              |                 |
| 66 | 17  | 60,593,264  | 60,593,264  | 1                |                  |                  |        |          |                         | -                   | -         | 1              | 1              | 1              | 1               | 1              | 1                                            | 0              | 0               | 0              | 42                                            | 11             | 0               | 9              | 42                                   | M                                                 | M              | M               | M              | M              |                 |                |                 |
| 73 | 10  | 60,886,318  | 60,886,320  | 3                |                  |                  |        |          |                         | ENSRNOG000000029537 | Or1e1     | 2              | 2              | 2              | 2               | 2              | 0                                            | 0              | 2               | 0              | 21                                            | -              | 39              | -              | 39                                   | M                                                 | -              | -               | -              | -              |                 |                |                 |
| 74 | 14  | 9,489,287   | 9,489,287   | 1                | +                |                  |        |          |                         | -                   | -         | 1              | 1              | 1              | 1               | 0              | 1                                            | 0              | 0               | 0              | 39                                            | -              | 4               | -              | 39                                   | P                                                 | -              | -               | -              | -              |                 |                |                 |
| 77 | 2   | 28,379,619  | 28,379,619  | 1                |                  |                  |        |          |                         | -                   | -         | 1              | 1              | 1              | 1               | 0              | 0                                            | 0              | 1               | 0              | 6                                             | -              | 39              | -              | 39                                   | M                                                 | -              | -               | -              | -              |                 |                |                 |
| 78 | 4   | 62,776,202  | 62,776,202  | 1                |                  |                  |        |          |                         | -                   | -         | 1              | 0              | 0              | 1               | 1              | 0                                            | 0              | 1               | 0              | -                                             | 39             | -               | 39             | -                                    | 39                                                | -              | -               | -              | -              | P               |                |                 |
| 79 | 14  | 18,639,418  | 18,639,756  | 339              |                  |                  |        |          |                         | ENSRNOG000000021347 | Mthfd2l   | 20             | 8              | 19             | 8               | 19             | 0                                            | 12             | 0               | 10             | 8                                             | 27             | 38              | 21             | 38                                   | M                                                 | M              | M               | M              | M              |                 |                |                 |
| 81 | 14  | 92,850,225  | 92,850,398  | 174              | +                |                  |        |          |                         | ENSRNOG000000004290 | Grb10     | 10             | 10             | 10             | 10              | 0              | 9                                            | 0              | 7               | 0              | 38                                            | -              | 36              | -              | 38                                   | P                                                 | -              | -               | -              | -              |                 |                |                 |
| 84 | 19  | 12,443,227  | 12,443,227  | 1                |                  |                  |        |          |                         | ENSRNOG000000013742 | Large     | 1              | 1              | 1              | 1               | 0              | 1                                            | 0              | 0               | 0              | 36                                            | -              | 13              | -              | 36                                   | P                                                 | -              | -               | -              | -              |                 |                |                 |
| 85 | 14  | 18,997,415  | 18,997,782  | 368              | +                |                  |        |          |                         | ENSRNOG000000042849 | Afm       | 18             | 0              | 0              | 0               | 17             | 0                                            | 0              | 0               | 14             | -                                             | 1              | -               | 36             | 36                                   | -                                                 | -              | M               | -              | -              | -               |                |                 |
| 86 | 17  | 1,854,518   | 1,854,518   | 1                |                  |                  |        |          |                         | -                   | -         | 1              | 1              | 1              | 1               | 0              | 1                                            | 0              | 0               | 0              | 36                                            | -              | 4               | -              | 36                                   | M                                                 | -              | -               | -              | -              |                 |                |                 |
| 87 | 1   | 113,872,519 | 113,872,519 | 1                | +                |                  |        |          |                         | -                   | -         | 1              | 0              | 1              | 0               | 1              | 0                                            | 1              | 0               | 0              | -                                             | 36             | -               | 2              | 36                                   | -                                                 | -              | P               | -              | -              | -               |                |                 |
| 88 | 15  | 70,910,698  | 70,910,698  | 1                |                  |                  |        |          |                         | -                   | -         | 1              | 1              | 1              | 1               | 0              | 0                                            | 0              | 1               | 0              | 4                                             | -              | 36              | -              | 36                                   | M                                                 | -              | -               | -              | -              |                 |                |                 |
| 89 | 17  | 83,654,995  | 83,6        |                  |                  |                  |        |          |                         |                     |           |                |                |                |                 |                |                                              |                |                 |                |                                               |                |                 |                |                                      |                                                   |                |                 |                |                |                 |                |                 |
