# Supplementary material for: Genetic Analysis of the Cardiac Methylome at Single Nucleotide Resolution in a Model of Human Cardiovascular Disease
Source: PubMed Central journal article supplement (PMC4256262; doi:10.1371/journal.pgen.1004813), 2014-12-04
Supplement: pgen.1004813.s023.pdf [file pgen.1004813.s023.pdf]

Table S10 Summary of validation of parent-of-origin specific differences in methylation by targeted bisulfite-seq

| Region ID <sup>a</sup> | Locus           | Amplicon Coordinates         | CpG Position | Strand | BN                         |                                |                            |                                |                                                 |                                           |                   | SHR                                               |                            |                                |                            |                                |                                                 |                                           |                   |                                                   |
|------------------------|-----------------|------------------------------|--------------|--------|----------------------------|--------------------------------|----------------------------|--------------------------------|-------------------------------------------------|-------------------------------------------|-------------------|---------------------------------------------------|----------------------------|--------------------------------|----------------------------|--------------------------------|-------------------------------------------------|-------------------------------------------|-------------------|---------------------------------------------------|
|                        |                 |                              |              |        | Maternal Coverage [x-fold] | Maternal Methylation Level [%] | Paternal Coverage [x-fold] | paternal Methylation Level [%] | Delta Methylation Level (Maternal-Paternal) [%] | P <sub>fisher</sub> Adjusted <sup>b</sup> | sig. <sup>c</sup> | Allele Showing Increased Methylation <sup>d</sup> | Maternal Coverage [x-fold] | Maternal Methylation Level [%] | Paternal Coverage [x-fold] | Paternal Methylation Level [%] | Delta Methylation Level (Maternal-Paternal) [%] | P <sub>fisher</sub> Adjusted <sup>b</sup> | sig. <sup>c</sup> | Allele Showing Increased Methylation <sup>d</sup> |
| 44                     | F1LUE4_RAT-Sgk1 | chr1:23,480,246-23,480,522   | 23,480,271   | +      | 1035                       | 80                             | 1033                       | 43                             | 37                                              | 3.00E-068                                 | *                 | M                                                 | 1037                       | 80                             | 1037                       | 73                             | 7                                               | 3.73E-004                                 | *                 | M                                                 |
| 44                     | F1LUE4_RAT-Sgk1 | chr1:23,480,246-23,480,522   | 23,480,286   | +      | 1039                       | 58                             | 1036                       | 16                             | 42                                              | 1.77E-091                                 | *                 | M                                                 | 1036                       | 52                             | 1039                       | 65                             | -12                                             | 1.09E-008                                 | *                 | P                                                 |
| 44                     | F1LUE4_RAT-Sgk1 | chr1:23,480,246-23,480,522   | 23,480,303   | +      | 1039                       | 79                             | 1034                       | 49                             | 30                                              | 2.03E-045                                 | *                 | M                                                 | 1036                       | 81                             | 1038                       | 77                             | 4                                               | 3.24E-002                                 | *                 | M                                                 |
| 44                     | F1LUE4_RAT-Sgk1 | chr1:23,480,246-23,480,522   | 23,480,308   | +      | 1039                       | 75                             | 1036                       | 62                             | 13                                              | 9.81E-011                                 | *                 | M                                                 | 1036                       | 91                             | 1037                       | 72                             | 19                                              | 8.33E-030                                 | *                 | M                                                 |
| 44                     | F1LUE4_RAT-Sgk1 | chr1:23,480,246-23,480,522   | 23,480,318   | +      | 1036                       | 75                             | 1036                       | 46                             | 29                                              | 6.01E-042                                 | *                 | M                                                 | 1035                       | 77                             | 1040                       | 59                             | 18                                              | 1.23E-018                                 | *                 | M                                                 |
| 44                     | F1LUE4_RAT-Sgk1 | chr1:23,480,246-23,480,522   | 23,480,342   | +      | 1038                       | 81                             | 1031                       | 60                             | 21                                              | 6.49E-026                                 | *                 | M                                                 | 1037                       | 92                             | 1039                       | 75                             | 17                                              | 3.58E-026                                 | *                 | M                                                 |
| 44                     | F1LUE4_RAT-Sgk1 | chr1:23,480,246-23,480,522   | 23,480,347   | +      | 1034                       | 91                             | 1033                       | 55                             | 36                                              | 5.19E-081                                 | *                 | M                                                 | 1032                       | 95                             | 1033                       | 84                             | 11                                              | 3.41E-017                                 | *                 | M                                                 |
| 44                     | F1LUE4_RAT-Sgk1 | chr1:23,480,246-23,480,522   | 23,480,349   | +      | 1032                       | 88                             | 1033                       | 57                             | 31                                              | 2.24E-058                                 | *                 | M                                                 | 1032                       | 96                             | 1031                       | 81                             | 15                                              | 1.73E-027                                 | *                 | M                                                 |
| 44                     | F1LUE4_RAT-Sgk1 | chr1:23,480,246-23,480,522   | 23,480,352   | +      | 1032                       | 93                             | 1030                       | 68                             | 25                                              | 1.11E-049                                 | *                 | M                                                 | 1033                       | 88                             | 1032                       | 84                             | 4                                               | 1.23E-002                                 | *                 | M                                                 |
| 44                     | F1LUE4_RAT-Sgk1 | chr1:23,480,246-23,480,522   | 23,480,359   | +      | 984                        | 92                             | 988                        | 70                             | 22                                              | 7.79E-036                                 | *                 | M                                                 | 95                         | 86                             | 82                         | 79                             | 7                                               | 2.45E-001                                 | M                 |                                                   |
| 44                     | F1LUE4_RAT-Sgk1 | chr1:23,480,246-23,480,522   | 23,480,361   | +      | 986                        | 90                             | 988                        | 62                             | 28                                              | 4.22E-049                                 | *                 | M                                                 | 97                         | 76                             | 82                         | 79                             | -3                                              | 7.31E-001                                 | P                 |                                                   |
| 44                     | F1LUE4_RAT-Sgk1 | chr1:23,480,246-23,480,522   | 23,480,363   | +      | 1032                       | 87                             | 1026                       | 60                             | 27                                              | 4.16E-044                                 | *                 | M                                                 | 1030                       | 93                             | 1031                       | 82                             | 10                                              | 3.03E-012                                 | *                 | M                                                 |
| 44                     | F1LUE4_RAT-Sgk1 | chr1:23,480,246-23,480,522   | 23,480,365   | +      | 1035                       | 89                             | 1024                       | 67                             | 21                                              | 4.97E-032                                 | *                 | M                                                 | 1033                       | 97                             | 1036                       | 89                             | 8                                               | 2.69E-013                                 | *                 | M                                                 |
| 44                     | F1LUE4_RAT-Sgk3 | chr1:23,480,246-23,480,522   | 23,480,369   | +      | 1036                       | 81                             | 1034                       | 53                             | 28                                              | 1.12E-042                                 | *                 | M                                                 | 1039                       | 72                             | 1040                       | 73                             | -1                                              | 5.68E-001                                 | P                 |                                                   |
| 44                     | F1LUE4_RAT-Sgk4 | chr1:23,480,246-23,480,522   | 23,480,438   | +      | 654                        | 52                             | 656                        | 18                             | 34                                              | 2.82E-038                                 | *                 | M                                                 | 412                        | 66                             | 501                        | 52                             | 13                                              | 8.11E-005                                 | *                 | M                                                 |
| 44                     | F1LUE4_RAT-Sgk5 | chr1:23,480,246-23,480,522   | 23,480,444   | +      | 654                        | 63                             | 662                        | 27                             | 36                                              | 8.81E-041                                 | *                 | M                                                 | 412                        | 70                             | 501                        | 58                             | 12                                              | 2.73E-004                                 | *                 | M                                                 |
| 44                     | F1LUE4_RAT-Sgk6 | chr1:23,480,246-23,480,522   | 23,480,473   | +      | 655                        | 76                             | 662                        | 51                             | 25                                              | 7.94E-021                                 | *                 | M                                                 | 411                        | 85                             | 499                        | 74                             | 11                                              | 3.44E-005                                 | *                 | M                                                 |
| 44                     | F1LUE4_RAT-Sgk7 | chr1:23,480,246-23,480,522   | 23,480,494   | +      | 633                        | 80                             | 641                        | 60                             | 20                                              | 5.93E-015                                 | *                 | M                                                 | 383                        | 93                             | 468                        | 78                             | 16                                              | 4.78E-011                                 | *                 | M                                                 |
| 214                    |                 | chr1:116,594,592-116,594,886 | 116,594,623  | +      | 1063                       | 47                             | 1061                       | 2                              | 45                                              | 6.01E-151                                 | *                 | M                                                 | 1053                       | 9                              | 1055                       | 1                              | 8                                               | 1.77E-017                                 | *                 | M                                                 |
| 214                    |                 | chr1:116,594,592-116,594,886 | 116,594,623  | -      | 1064                       | 48                             | 1055                       | 1                              | 47                                              | 1.90E-163                                 | *                 | M                                                 | 1065                       | 34                             | 1053                       | 0                              | 33                                              | 1.38E-111                                 | *                 | M                                                 |
| 214                    |                 | chr1:116,594,592-116,594,886 | 116,594,632  | +      | 1064                       | 28                             | 1060                       | 1                              | 28                                              | 1.36E-088                                 | *                 | M                                                 | 1054                       | 5                              | 1053                       | 0                              | 5                                               | 4.50E-014                                 | *                 | M                                                 |
| 214                    |                 | chr1:116,594,592-116,594,886 | 116,594,632  | -      | 1065                       | 39                             | 1059                       | 5                              | 34                                              | 9.10E-088                                 | *                 | M                                                 | 1066                       | 33                             | 1057                       | 1                              | 33                                              | 1.23E-107                                 | *                 | M                                                 |
| 214                    |                 | chr1:116,594,592-116,594,886 | 116,594,637  | +      | 1066                       | 9                              | 1059                       | 1                              | 8                                               | 3.46E-020                                 | *                 | M                                                 | 1054                       | 16                             | 1055                       | 4                              | 12                                              | 2.94E-020                                 | *                 | M                                                 |
| 214                    |                 | chr1:116,594,592-116,594,886 | 116,594,637  | -      | 1068                       | 19                             | 1061                       | 1                              | 18                                              | 1.52E-052                                 | *                 | M                                                 | 1065                       | 31                             | 1058                       | 0                              | 31                                              | 6.94E-105                                 | *                 | M                                                 |
| 214                    |                 | chr1:116,594,592-116,594,886 | 116,594,664  | -      | 1063                       | 13                             | 1060                       | 1                              | 12                                              | 3.87E-032                                 | *                 | M                                                 | 1067                       | 27                             | 1057                       | 0                              | 27                                              | 8.31E-089                                 | *                 | M                                                 |
| 214                    |                 | chr1:116,594,592-116,594,886 | 116,594,674  | +      | 1064                       | 37                             | 1062                       | 1                              | 37                                              | 1.03E-127                                 | *                 | M                                                 | 1054                       | 25                             | 1056                       | 1                              | 24                                              | 8.65E-070                                 | *                 | M                                                 |
| 214                    |                 | chr1:116,594,592-116,594,886 | 116,594,674  | -      | 1063                       | 23                             | 1062                       | 1                              | 22                                              | 1.51E-067                                 | *                 | M                                                 | 1064                       | 16                             | 1056                       | 1                              | 15                                              | 1.19E-042                                 | *                 | M                                                 |
| 214                    |                 | chr1:116,594,592-116,594,886 | 116,594,696  | -      | 725                        | 10                             | 587                        | 3                              | 6                                               | 8.56E-006                                 | *                 | M                                                 | 610                        | 2                              | 553                        | 4                              | -2                                              | 1.00E-001                                 | P                 |                                                   |
| 214                    |                 | chr1:116,594,592-116,594,886 | 116,594,723  | +      | 1066                       | 29                             | 1062                       | 3                              | 27                                              | 1.58E-070                                 | *                 | M                                                 | 1055                       | 22                             | 1057                       | 2                              | 20                                              | 3.61E-055                                 | *                 | M                                                 |
| 214                    |                 | chr1:116,594,592-116,594,886 | 116,594,723  | -      | 736                        | 30                             | 586                        | 1                              | 29                                              | 3.55E-054                                 | *                 | M                                                 | 610                        | 13                             | 553                        | 1                              | 12                                              | 1.90E-015                                 | *                 | M                                                 |
| 214                    |                 | chr1:116,594,592-116,594,886 | 116,594,744  | +      | 997                        | 11                             | 995                        | 5                              | 7                                               | 6.33E-008                                 | *                 | M                                                 | 971                        | 31                             | 996                        | 1                              | 30                                              | 8.38E-088                                 | *                 | M                                                 |
| 214                    |                 | chr1:116,594,592-116,594,886 | 116,594,744  | -      | 993                        | 14                             | 919                        | 1                              | 13                                              | 1.44E-031                                 | *                 | M                                                 | 969                        | 14                             | 967                        | 2                              | 12                                              | 9.64E-024                                 | *                 | M                                                 |
| 214                    |                 | chr1:116,594,592-116,594,886 | 116,594,755  | +      | 1017                       | 37                             | 1022                       | 3                              | 35                                              | 5.25E-096                                 | *                 | M                                                 | 1014                       | 47                             | 1020                       | 3                              | 44                                              | 5.55E-135                                 | *                 | M                                                 |
| 214                    |                 | chr1:116,594,592-116,594,886 | 116,594,755  | -      | 999                        | 49                             | 923                        | 3                              | 46                                              | 4.27E-132                                 | *                 | M                                                 | 972                        | 34                             | 973                        | 8                              | 26                                              | 2.74E-046                                 | *                 | M                                                 |
| 214                    |                 | chr1:116,594,592-116,594,886 | 116,594,774  | +      | 1061                       | 16                             | 1059                       | 3                              | 13                                              | 3.67E-025                                 | *                 | M                                                 | 1059                       | 21                             | 1060                       | 1                              | 19                                              | 9.72E-055                                 | *                 | M                                                 |
| 214                    |                 | chr1:116,594,592-116,594,886 | 116,594,774  | -      | 1000                       | 18                             | 921                        | 3                              | 15                                              | 1.13E-029                                 | *                 | M                                                 | 975                        | 26                             | 970                        | 2                              | 24                                              | 6.45E-061                                 | *                 | M                                                 |
| 214                    |                 | chr1:116,594,592-116,594,886 | 116,594,786  | +      | 1065                       | 32                             | 1062                       | 4                              | 28                                              | 1.50E-070                                 | *                 | M                                                 | 1061                       | 31                             | 1060                       | 3                              | 28                                              | 1.76E-069                                 | *                 | M                                                 |
| 214                    |                 | chr1:116,594,592-116,594,886 | 116,594,786  | -      | 1003                       | 31                             | 923                        | 4                              | 26                                              | 2.16E-056                                 | *                 | M                                                 | 974                        | 35                             | 970                        | 2                              | 33                                              | 8.62E-089                                 | *                 | M                                                 |
| 214                    |                 | chr1:116,594,592-116,594,886 | 116,594,788  | +      | 1064                       | 30                             | 1063                       | 3                              | 26                                              | 8.88E-068                                 | *                 | M                                                 | 1060                       | 29                             | 1059                       | 2                              | 27                                              | 3.20E-074                                 | *                 | M                                                 |
| 214                    |                 | chr1:116,594,592-116,594,886 | 116,594,788  | -      | 1003                       | 36                             | 923                        | 2                              | 34                                              | 7.97E-089                                 | *                 | M                                                 | 975                        | 15                             | 973                        | 3                              | 12                                              | 6.24E-021                                 | *                 | M                                                 |
| 214                    |                 | chr1:116,594,592-116,594,886 | 116,594,806  | +      | 1066                       | 17                             | 1063                       | 3                              | 14                                              | 3.41E-027                                 | *                 | M                                                 | 1061                       | 34                             | 1059                       | 2                              | 32                                              | 1.09E-095                                 | *                 | M                                                 |
| 214                    |                 | chr1:116,594,592-116,594,886 | 116,594,806  | -      | 1003                       | 34                             | 922                        | 2                              | 32                                              | 1.23E-082                                 | *                 | M                                                 | 973                        | 18                             | 973                        | 4                              | 14                                              | 1.63E-025                                 | *                 | M                                                 |
| 214                    |                 | chr1:116,594,592-116,594,886 | 116,594,810  | +      | 1059                       | 22                             | 1063                       | 1                              | 21                                              | 1.29E-063                                 | *                 | M                                                 | 1061                       | 7                              | 1059                       | 2                              | 5                                               | 1.32E-008                                 | *                 | M                                                 |
| 214                    |                 | chr1:116,594,592-116,594,886 | 116,594,810  | -      | 1001                       | 12                             | 921                        | 3                              | 9                                               | 7.01E-015                                 | *                 | M                                                 | 972                        | 22                             | 972                        | 2                              | 16                                              | 4.92E-037                                 | *                 | M                                                 |
| 214                    |                 | chr1:116,594,592-116,594,886 | 116,594,815  | +      | 1065                       | 34                             | 1063                       | 2                              | 32                                              | 2.62E-099                                 | *                 | M                                                 | 1062                       | 22                             | 1059                       | 3                              | 19                                              | 1.11E-042                                 | *                 | M                                                 |
| 214                    |                 | chr1:116,594,592-116,594,886 | 116,594,815  | -      | 985                        | 26                             | 905                        | 2                              | 23                                              | 1.18E-053                                 | *                 | M                                                 | 956                        | 10                             | 954                        | 6                              | 5                                               | 1.64E-004                                 | *                 | M                                                 |
| 214                    |                 | chr1:116,594,592-116,594,886 | 116,594,845  | +      | 1066                       | 8                              | 1063                       | 1                              | 7                                               | 2.82E-015                                 | *                 | M                                                 | 1061                       | 10                             | 1060                       | 1                              | 9                                               | 2.80E-022                                 | *                 | M                                                 |
| 214                    |                 | chr1:116,594,592-116,594,886 | 116,594,862  | +      | 1062                       | 4                              | 1054                       | 2                              | 2                                               | 7.80E-004                                 | *                 | M                                                 | 1059                       | 8                              | 1057                       | 0                              | 8                                               | 3.01E-021                                 | *                 | M                                                 |
| 111                    |                 | chr1:202,823,579-202,823,854 | 202,823,599  | +      | 1065                       | 74                             | 1069                       | 92                             | -19                                             | 1.06E-030                                 | *                 | M                                                 | 1064                       | 58                             | 1067                       | 82                             | -25                                             | 3.61E-036                                 | *                 | P                                                 |
| 111                    |                 | chr1:202,823,579-202,823,854 | 202,823,614  | +      | 1067                       | 79                             | 1074                       | 97                             | -18                                             | 6.27E-043                                 | *                 | M                                                 | 1068                       | 76                             | 1069                       | 94                             | -18                                             | 2.33E-031                                 | *                 | P                                                 |
| 111                    |                 | chr1:202,823,579-202,823,854 | 202,823,630  | +      | 1065                       | 12                             | 1076                       | 89                             | -77                                             | 5.01E-030                                 | *                 | M                                                 | 1071                       | 25                             | 1069                       | 85                             | -60                                             | 2.85E-182                                 | *                 | P                                                 |
| 111                    |                 | chr1:202,823,579-202,823,854 | 202,823,635  | +      | 1065                       | 11                             | 1076                       | 79                             | -67                                             | 7.51E-234                                 | *                 | M                                                 | 1070                       | 30                             | 1070                       | 85                             | -55                                             | 3.07E-153                                 | *                 | P                                                 |
| 111                    |                 | chr1:202,823,579-202,823,854 | 202,823,697  | +      | 405                        | 75                             | 361                        | 89                             | -14                                             | 5.41E-007                                 | *                 | M                                                 | 317                        | 82                             | 388                        | 96                             | -14                                             | 7.10E-010                                 | *                 | P                                                 |
| 111                    |                 | chr1:202,823,579-202,823,854 | 202,823,715  | +      | 998                        | 66                             | 991                        | 97                             | -31                                             | 1.91E-077                                 | *                 | M                                                 | 983                        | 52                             | 976                        | 63                             | -11                                             | 7.59E-007                                 | *                 | P                                                 |
| 97                     |                 | chr4:57,445,980-57,446,560   | 57,446,138   | +      | 335                        | 75                             | 544                        | 12                             | 63                                              | 5.54E-082                                 | *                 | M                                                 | 381                        | 74                             | 406                        | 16                             | 58                                              | 1.04E-063                                 | *                 | M                                                 |
| 97                     |                 | chr4:57,445,980-57,446,560   | 57,446,147   | +      | 335                        | 77                             | 538                        | 18                             | 59                                              | 2.19E-068                                 | *                 | M                                                 | 381                        | 65                             | 405                        | 25                             | 40                                              | 2.67E-030                                 | *                 | M                                                 |
| 97                     |                 | chr4:57,445,980-57,446,560   | 57,446,230   | +      | 910                        | 59                             | 812                        | 4                              | 55                                              | 3.26E-150                                 | *                 | M                                                 | 594                        | 44                             | 741                        | 4                              | 39                                              | 1.40E-070                                 | *                 | M                                                 |
| 97                     |                 | chr4:57,445,980-57,446,560   | 57,446,235   | +      | 909                        | 63                             | 814                        | 11                             | 52                                              | 1.97E-117                                 | *                 | M                                                 | 596                        | 57                             | 742                        | 13                             | 44                                              | 4.96E-066                                 | *                 | M                                                 |
| 97                     |                 | chr4:57,445,980-57,446,560   | 57,446,241   | +      | 909                        | 28                             | 811                        | 1                              | 27                                              | 3.36E-064                                 | *                 | M                                                 | 594                        | 31                             | 739                        | 8                              | 23                                              | 2.04E-027                                 | *                 | M                                                 |
| 97                     |                 | chr4:57,445,980-57,446,560   | 57,446,376   | +      | 495                        | 99                             | 755                        | 92                             | 7                                               | 1.32E-008                                 | *                 | M                                                 | 736                        | 91                             | 678                        | 94                             | -3                                              | 2.05E-002                                 | *                 | P                                                 |
| 97                     |                 | chr4:57,445,980-57,446,560   | 57,446,376   | -      | 1042                       | 99                             | 1025                       | 93                             | 5                                               | 8.70E-010                                 | *                 | M                                                 | 1043                       | 94                             | 1042                       | 97                             | -3                                              | 4.93E-004                                 | *                 | P                                                 |
| 97                     |                 | chr4:57,445,980-57,446,560   | 57,446,389   | +      | 496                        | 86                             | 756                        | 70                             | 16                                              | 6.78E-011                                 | *                 | M                                                 | 737                        | 92                             | 678                        | 73                             | 19                                              | 4.29E-021                                 | *                 | M                                                 |
| 97                     |                 | chr4:57,445,980-57,446,560   | 57,446,389   | -      | 1045                       | 97                             | 1034                       | 68                             | 28                                              |                                           |                   |                                                   |                            |                                |                            |                                |                                                 |                                           |                   |                                                   |

|     |                              |             |   |      |     |      |     |    |             |   |      |     |      |    |     |             |   |
|-----|------------------------------|-------------|---|------|-----|------|-----|----|-------------|---|------|-----|------|----|-----|-------------|---|
| 97  | chr4:57,445,980-57,446,560   | 57,446,414  | + | 582  | 93  | 852  | 99  | -6 | 5.81E-009 * | M | 794  | 100 | 723  | 93 | 7   | 5.32E-014 * | M |
| 97  | chr4:57,445,980-57,446,560   | 57,446,414  | - | 574  | 100 | 583  | 100 | 0  | 1.00E+000   | M | 641  | 100 | 589  | 95 | 5   | 5.22E-009 * | M |
| 97  | chr4:57,445,980-57,446,560   | 57,446,417  | + | 633  | 88  | 880  | 84  | 4  | 2.61E-002 * | M | 829  | 93  | 748  | 93 | 0   | 7.65E-001   | M |
| 97  | chr4:57,445,980-57,446,560   | 57,446,417  | - | 597  | 91  | 607  | 93  | -1 | 3.97E-001   | M | 666  | 96  | 604  | 79 | 16  | 2.66E-020 * | M |
| 97  | chr4:57,445,980-57,446,560   | 57,446,508  | + | 994  | 94  | 990  | 89  | 5  | 2.57E-004 * | M | 1002 | 95  | 1003 | 87 | 8   | 3.02E-009 * | M |
| 97  | chr4:57,445,980-57,446,560   | 57,446,508  | - | 975  | 99  | 968  | 96  | 4  | 9.72E-009 * | M | 989  | 96  | 983  | 70 | 26  | 2.66E-058 * | M |
| 97  | chr4:57,445,980-57,446,560   | 57,446,523  | + | 987  | 88  | 991  | 93  | -4 | 1.31E-003 * | M | 1007 | 90  | 1011 | 88 | 2   | 2.07E-001   | M |
| 97  | chr4:57,445,980-57,446,560   | 57,446,523  | - | 974  | 99  | 964  | 95  | 5  | 4.38E-010 * | M | 986  | 100 | 983  | 81 | 19  | 9.92E-060 * | M |
| 147 | chr5:141,638,136-141,638,442 | 141,638,171 | + | 1044 | 78  | 1049 | 53  | 25 | 4.96E-033 * | M | 1046 | 78  | 1056 | 71 | 8   | 7.00E-005 * | M |
| 147 | chr5:141,638,136-141,638,442 | 141,638,199 | + | 1043 | 90  | 1052 | 44  | 45 | 2.54E-114 * | M | 1047 | 85  | 1055 | 48 | 38  | 1.72E-076 * | M |
| 147 | chr5:141,638,136-141,638,442 | 141,638,215 | + | 1044 | 68  | 1050 | 24  | 45 | 9.60E-096 * | M | 1049 | 55  | 1055 | 56 | -1  | 7.32E-001   | P |
| 147 | chr5:141,638,136-141,638,442 | 141,638,252 | + | 1108 | 78  | 1117 | 44  | 34 | 1.19E-061 * | M | 1115 | 61  | 1112 | 31 | 30  | 3.41E-045 * | M |
| 147 | chr5:141,638,136-141,638,442 | 141,638,271 | + | 903  | 81  | 906  | 47  | 33 | 6.75E-050 * | M | 872  | 85  | 957  | 37 | 48  | 1.41E-102 * | M |
| 147 | chr5:141,638,136-141,638,442 | 141,638,284 | + | 957  | 78  | 933  | 62  | 17 | 1.36E-015 * | M | 924  | 80  | 975  | 62 | 18  | 3.45E-017 * | M |
| 147 | chr5:141,638,136-141,638,442 | 141,638,300 | + | 1007 | 89  | 1007 | 87  | 3  | 7.49E-002   | M | 1009 | 93  | 1007 | 76 | 17  | 2.75E-027 * | M |
| 147 | chr5:141,638,136-141,638,442 | 141,638,363 | + | 1042 | 71  | 1046 | 50  | 21 | 7.04E-023 * | M | 1040 | 72  | 1037 | 69 | 3   | 2.22E-001   | M |
| 147 | chr5:141,638,136-141,638,442 | 141,638,386 | + | 1079 | 55  | 1081 | 49  | 6  | 3.57E-003 * | M | 1069 | 59  | 1072 | 46 | 14  | 2.50E-010 * | M |
| 79  | chr14:18,639,302-18,639,840  | 18,639,378  | + | 1084 | 29  | 1089 | 4   | 26 | 1.49E-064 * | M | 1067 | 18  | 1092 | 24 | -6  | 1.12E-003 * | P |
| 79  | chr14:18,639,302-18,639,840  | 18,639,378  | - | 1047 | 46  | 1050 | 2   | 43 | 4.91E-139 * | M | 1044 | 36  | 1050 | 8  | 28  | 2.26E-058 * | M |
| 79  | chr14:18,639,302-18,639,840  | 18,639,417  | + | 1094 | 59  | 1101 | 28  | 31 | 9.12E-048 * | M | 1076 | 57  | 1099 | 38 | 19  | 3.60E-018 * | M |
| 79  | chr14:18,639,302-18,639,840  | 18,639,417  | - | 1046 | 54  | 1049 | 11  | 43 | 1.50E-103 * | M | 1045 | 60  | 1049 | 47 | 13  | 1.91E-009 * | M |
| 79  | chr14:18,639,302-18,639,840  | 18,639,419  | + | 1097 | 37  | 1101 | 23  | 14 | 1.57E-012 * | M | 1076 | 35  | 1097 | 33 | 2   | 2.88E-001   | M |
| 79  | chr14:18,639,302-18,639,840  | 18,639,419  | - | 1047 | 54  | 1050 | 15  | 39 | 6.71E-081 * | M | 1046 | 26  | 1050 | 46 | -20 | 7.36E-022 * | P |
| 79  | chr14:18,639,302-18,639,840  | 18,639,467  | + | 988  | 49  | 981  | 40  | 9  | 6.92E-005 * | M | 917  | 65  | 917  | 30 | 35  | 1.63E-051 * | M |
| 79  | chr14:18,639,302-18,639,840  | 18,639,467  | - | 1003 | 66  | 1001 | 6   | 60 | 2.64E-192 * | M | 1004 | 48  | 1011 | 26 | 21  | 3.99E-023 * | M |
| 79  | chr14:18,639,302-18,639,840  | 18,639,471  | + | 991  | 56  | 980  | 41  | 16 | 4.26E-012 * | M | 918  | 71  | 919  | 53 | 19  | 1.55E-016 * | M |
| 79  | chr14:18,639,302-18,639,840  | 18,639,471  | - | 570  | 90  | 601  | 20  | 70 | 5.71E-140 * | M | 516  | 77  | 709  | 54 | 23  | 1.58E-016 * | M |
| 79  | chr14:18,639,302-18,639,840  | 18,639,483  | + | 1009 | 57  | 1004 | 57  | 0  | 9.00E-001   | M | 931  | 80  | 936  | 55 | 24  | 2.22E-029 * | M |
| 79  | chr14:18,639,302-18,639,840  | 18,639,483  | - | 641  | 94  | 643  | 50  | 44 | 3.21E-074 * | M | 583  | 96  | 801  | 58 | 39  | 4.65E-068 * | M |
| 79  | chr14:18,639,302-18,639,840  | 18,639,510  | + | 1036 | 71  | 1046 | 45  | 26 | 3.97E-033 * | M | 1031 | 82  | 1025 | 53 | 30  | 4.29E-047 * | M |
| 79  | chr14:18,639,302-18,639,840  | 18,639,510  | - | 646  | 93  | 645  | 32  | 61 | 8.34E-126 * | M | 587  | 72  | 807  | 35 | 37  | 1.78E-042 * | M |
| 79  | chr14:18,639,302-18,639,840  | 18,639,525  | + | 1040 | 65  | 1046 | 47  | 18 | 8.28E-017 * | M | 1034 | 82  | 1028 | 60 | 23  | 2.43E-030 * | M |
| 79  | chr14:18,639,302-18,639,840  | 18,639,525  | - | 645  | 91  | 647  | 21  | 70 | 3.49E-155 * | M | 586  | 66  | 806  | 37 | 29  | 2.63E-027 * | M |
| 79  | chr14:18,639,302-18,639,840  | 18,639,565  | + | 1036 | 59  | 1046 | 21  | 38 | 5.91E-072 * | M | 1030 | 58  | 1027 | 39 | 19  | 4.59E-018 * | M |
| 79  | chr14:18,639,302-18,639,840  | 18,639,565  | - | 647  | 64  | 639  | 4   | 60 | 7.44E-128 * | M | 586  | 85  | 807  | 38 | 48  | 2.20E-075 * | M |
| 79  | chr14:18,639,302-18,639,840  | 18,639,644  | + | 964  | 76  | 939  | 42  | 34 | 6.54E-053 * | M | 903  | 78  | 875  | 59 | 19  | 7.38E-018 * | M |
| 79  | chr14:18,639,302-18,639,840  | 18,639,644  | - | 1070 | 66  | 1070 | 29  | 38 | 1.21E-068 * | M | 1063 | 81  | 1064 | 46 | 35  | 2.22E-064 * | M |
| 79  | chr14:18,639,302-18,639,840  | 18,639,652  | + | 965  | 68  | 940  | 43  | 25 | 5.05E-029 * | M | 903  | 77  | 874  | 61 | 16  | 9.50E-014 * | M |
| 79  | chr14:18,639,302-18,639,840  | 18,639,652  | - | 1020 | 71  | 1031 | 39  | 32 | 4.58E-047 * | M | 982  | 81  | 998  | 55 | 26  | 1.28E-036 * | M |
| 79  | chr14:18,639,302-18,639,840  | 18,639,674  | + | 966  | 62  | 941  | 30  | 32 | 7.17E-045 * | M | 904  | 70  | 876  | 28 | 42  | 4.45E-070 * | M |
| 79  | chr14:18,639,302-18,639,840  | 18,639,674  | - | 1029 | 51  | 1036 | 17  | 34 | 2.43E-062 * | M | 1007 | 70  | 1008 | 29 | 41  | 7.66E-077 * | M |
| 79  | chr14:18,639,302-18,639,840  | 18,639,679  | + | 982  | 80  | 952  | 50  | 30 | 1.19E-044 * | M | 914  | 89  | 880  | 76 | 13  | 2.83E-012 * | M |
| 79  | chr14:18,639,302-18,639,840  | 18,639,679  | - | 1033 | 73  | 1037 | 54  | 19 | 1.12E-019 * | M | 1009 | 86  | 1009 | 62 | 24  | 7.69E-034 * | M |
| 79  | chr14:18,639,302-18,639,840  | 18,639,683  | + | 1002 | 83  | 969  | 44  | 39 | 1.02E-075 * | M | 925  | 75  | 891  | 73 | 2   | 5.02E-001   | M |
| 79  | chr14:18,639,302-18,639,840  | 18,639,683  | - | 1033 | 66  | 1035 | 34  | 32 | 1.11E-047 * | M | 1008 | 82  | 1009 | 50 | 32  | 1.63E-051 * | M |
| 79  | chr14:18,639,302-18,639,840  | 18,639,696  | + | 1001 | 76  | 886  | 46  | 31 | 2.94E-043 * | M | 930  | 82  | 835  | 63 | 19  | 2.66E-019 * | M |
| 79  | chr14:18,639,302-18,639,840  | 18,639,696  | - | 1033 | 76  | 1035 | 36  | 40 | 9.11E-076 * | M | 1010 | 82  | 1007 | 43 | 39  | 3.37E-075 * | M |
| 79  | chr14:18,639,302-18,639,840  | 18,639,713  | + | 1022 | 86  | 895  | 49  | 37 | 8.78E-071 * | M | 943  | 82  | 844  | 71 | 11  | 4.30E-008 * | M |
| 79  | chr14:18,639,302-18,639,840  | 18,639,713  | - | 1037 | 74  | 1037 | 47  | 27 | 7.64E-036 * | M | 1014 | 82  | 1012 | 52 | 31  | 3.58E-049 * | M |
| 79  | chr14:18,639,302-18,639,840  | 18,639,717  | + | 1032 | 79  | 1011 | 45  | 34 | 5.26E-057 * | M | 1000 | 89  | 995  | 52 | 37  | 9.61E-077 * | M |
| 79  | chr14:18,639,302-18,639,840  | 18,639,717  | - | 1028 | 71  | 1037 | 34  | 37 | 6.20E-064 * | M | 1002 | 79  | 1001 | 52 | 28  | 4.40E-039 * | M |
| 79  | chr14:18,639,302-18,639,840  | 18,639,728  | + | 1051 | 74  | 1024 | 38  | 36 | 2.34E-061 * | M | 1012 | 75  | 1005 | 33 | 42  | 4.09E-083 * | M |
| 79  | chr14:18,639,302-18,639,840  | 18,639,728  | - | 988  | 61  | 983  | 25  | 36 | 2.16E-058 * | M | 959  | 74  | 962  | 44 | 31  | 1.13E-004 * | M |
| 79  | chr14:18,639,302-18,639,840  | 18,639,739  | + | 1056 | 71  | 1026 | 33  | 37 | 2.22E-066 * | M | 1017 | 77  | 1008 | 53 | 24  | 3.48E-002 * | M |
| 79  | chr14:18,639,302-18,639,840  | 18,639,739  | - | 990  | 69  | 983  | 31  | 38 | 1.06E-063 * | M | 961  | 76  | 962  | 43 | 33  | 1.03E-050 * | M |
| 79  | chr14:18,639,302-18,639,840  | 18,639,755  | + | 1051 | 62  | 1022 | 30  | 32 | 6.79E-050 * | M | 1014 | 66  | 1010 | 22 | 44  | 1.02E-009 * | M |
| 79  | chr14:18,639,302-18,639,840  | 18,639,755  | - | 992  | 45  | 983  | 21  | 24 | 5.05E-029 * | M | 967  | 58  | 962  | 19 | 38  | 8.45E-068 * | M |
| 79  | chr14:18,639,302-18,639,840  | 18,639,805  | + | 1009 | 83  | 985  | 57  | 26 | 3.58E-038 * | M | 1001 | 91  | 952  | 72 | 19  | 1.63E-002 * | M |
| 79  | chr14:18,639,302-18,639,840  | 18,639,805  | - | 379  | 83  | 401  | 46  | 37 | 1.70E-027 * | M | 348  | 85  | 346  | 53 | 33  | 6.12E-021 * | M |

Parent-of-origin specific methylation differences were determined on BN-derived chromosomes and on SHR-derived chromosomes separately. Increased methylation of the maternal allele is denoted as M, increased methylation of the paternal allele is denoted as P.

a) Region IDs refer to the ID in the # column of Table S7.

b) P values adjusted for multiple testing using the FDR method by Benjamini and Hochberg (Benjamini and Hochberg 1995).

c) Methylation differences statistically significant after multiple-testing correction (FDR < 5%) are marked with "\*\*".

d) Allele showing increased methylation: M = maternally derived allele; P = paternally derived allele.
