# Supplementary material for: Genetic Analysis of the Cardiac Methylome at Single Nucleotide Resolution in a Model of Human Cardiovascular Disease
Source: PubMed Central journal article supplement (PMC4256262; doi:10.1371/journal.pgen.1004813), 2014-12-04
Supplement: pgen.1004813.s024.pdf [file pgen.1004813.s024.pdf]

Table S11 Phenotypes tests for correlation with methylation measurements across the RI strain panel

| #   | Phenotype Name                                                                                                                                                                |
|-----|-------------------------------------------------------------------------------------------------------------------------------------------------------------------------------|
| 1   | ADP_induced_platelet_aggregation                                                                                                                                              |
| 2   | adrenal_Chga_chromogranin_A_fragments_ml                                                                                                                                      |
| 3   | adrenal_Chgb_chromogranin_B_fragments_ml                                                                                                                                      |
| 4   | adrenal_corticosterone_IU_mg_protein                                                                                                                                          |
| 5   | adrenal_dopamine_beta_hydroxylase_pmohmg_protein                                                                                                                              |
| 6   | adrenal_dopamine_ng_mg_protein                                                                                                                                                |
| 7   | Adrenal_Epinephrine                                                                                                                                                           |
| 8   | adrenal_epinephrine_ng_mg_protein                                                                                                                                             |
| 9   | adrenaline_stimulated_lipolysis_glycerol_levels_mmol_g_tissue_2h                                                                                                              |
| 10  | adrenaline_stimulated_lipolysis_NEFA_levels_mmol_g_tissue_2h                                                                                                                  |
| 11  | adrenal_norepinephrine_ng_mg_protein                                                                                                                                          |
| 12  | Adrenal_Norpinephrine                                                                                                                                                         |
| 13  | adrenal_PNMT_phenyleta_nolamine_mythyl_transferase_pmohmg_protein                                                                                                             |
| 14  | adrenal_Scg2_secretogranin_II_fragments_ml                                                                                                                                    |
| 15  | area_under_the_curve_during_intraperitoneal_glucose_tolerance_test_in_male_rats_fed_a_diet_with_60per_fructose_from_8_to_10_weeks                                             |
| 16  | area_under_the_curve_during_oral_glucose_tolerance_test_in_male_rats_fed_a_diet_with_60per_fructose_from_8_to_10_weeks_for_blood_glucose_level_mmolL2h                        |
| 17  | AUC_during_OGTT_for_insulin                                                                                                                                                   |
| 18  | AUC_during_OGTT_glycemia                                                                                                                                                      |
| 19  | basal_glucose_uptake_corrected_to_cell                                                                                                                                        |
| 20  | basal_glycogenesis_in_diaphragm_nmohlucose_g_2h                                                                                                                               |
| 21  | basal_lipogenesis_in_epididymal_fat_nmohlucose_g2h                                                                                                                            |
| 22  | basal_lipogenesis_in_epididymal_fat_nmohlucose_mg_protein2h                                                                                                                   |
| 23  | basal_lipolysis_glycerol_levels_mmol_g_tissue_2h                                                                                                                              |
| 24  | basal_lipolysis_NEFA_levels_mmol_g_tissue_2h                                                                                                                                  |
| 25  | basal_uptake_of_glucose_by_isolated_adipocytes_corrected_to_cell_volume                                                                                                       |
| 26  | blood_glucose_mmohl_0_in_during_OGTT                                                                                                                                          |
| 27  | blood_glucose_mmohl_120_min_during_OGTT                                                                                                                                       |
| 28  | blood_glucose_mmohl_30_min_during_OGTT                                                                                                                                        |
| 29  | blood_glucose_mmohl_60_min_during_OGTT                                                                                                                                        |
| 30  | body_weight_of_mothers_g                                                                                                                                                      |
| 31  | body_weights_g_males_10_wk_old                                                                                                                                                |
| 32  | CgA                                                                                                                                                                           |
| 33  | CgB                                                                                                                                                                           |
| 34  | cholesterol_content_in_liver                                                                                                                                                  |
| 35  | Compensatory_renal_growth_in_males_8_weeks_versus_5_weeks_scaled_to_body_weight                                                                                               |
| 36  | Conditioned_taste_aversion                                                                                                                                                    |
| 37  | Conditioned_taste_aversion_arcsin_transform                                                                                                                                   |
| 38  | Corticosterone                                                                                                                                                                |
| 39  | DBH                                                                                                                                                                           |
| 40  | Decapitated                                                                                                                                                                   |
| 41  | delta_captopril_effects_mm_Hg                                                                                                                                                 |
| 42  | delta_L_NAME_effects_mm_Hg                                                                                                                                                    |
| 43  | delta_pentolinium_effects_mm_Hg                                                                                                                                               |
| 44  | diastolic_blood_pressure_determined_by_direct_puncture_of_the_carotida_artery_under_light_ether_anaesthesia_in_12_week_old_males_fed_a_normal_lab_chow_at_generations_F16_F17 |
| 45  | diastolic_blood_pressure_determined_by_direct_puncture_of_the_carotida_artery_under_light_ether_anaesthesia_in_12_week_old_males_fed_a_normal_lab_chow_at_generations_F16_F18 |
| 46  | diastolic_blood_pressure_determined_by_direct_puncture_of_the_carotida_artery_under_light_ether_anaesthesia_in_12_week_old_males_fed_a_normal_lab_chow_at_generations_F16_F19 |
| 47  | diastolic_blood_pressure_determined_by_direct_puncture_of_the_carotida_artery_under_light_ether_anaesthesia_in_12_week_old_males_fed_a_normal_lab_chow_at_generations_F16_F20 |
| 48  | diastolic_blood_pressure_determined_by_direct_puncture_of_the_carotida_artery_under_light_ether_anaesthesia_in_12_week_old_males_fed_a_normal_lab_chow_at_generations_F16_F21 |
| 49  | diastolic_blood_pressure_determined_by_direct_puncture_of_the_carotida_artery_under_light_ether_anaesthesia_in_12_week_old_males_fed_a_normal_lab_chow_at_generations_F16_F22 |
| 50  | diastolic_blood_pressure_determined_by_direct_puncture_of_the_carotida_artery_under_light_ether_anaesthesia_in_12_week_old_males_fed_a_normal_lab_chow_at_generations_F16_F23 |
| 51  | difference_between_ins_0_vol_and_ins_50_vol                                                                                                                                   |
| 52  | difference_between_maximal_and_basal_glucose_uptake_corrected_to_cell                                                                                                         |
| 53  | dry_weight_of_copper_concentration_in_livers                                                                                                                                  |
| 54  | Epididymus_weight                                                                                                                                                             |
| 55  | Epididymus_weight_corrected_to_body_weight                                                                                                                                    |
| 56  | epididymus_weight_g_10_wks_old_rats                                                                                                                                           |
| 57  | epididymus_weight_g_10_wks_old_rats_corrected_to_100g_body_weight                                                                                                             |
| 58  | fat_cell_volume                                                                                                                                                               |
| 59  | fetal_weights_g_in_left_horn_of_the_uterus                                                                                                                                    |
| 60  | fetal_weights_g_in_right_horn_of_the_uterus                                                                                                                                   |
| 61  | glucose_concentrations_10_weeks_old_fed_a_diet_with_60per_fructose_from_8_weeks_to_10_weeks_male                                                                              |
| 62  | glucose_concentrations_8_weeks_old_fed_a_normal_lab_chow_male                                                                                                                 |
| 63  | glucose_concentrations_before_intraperitoneal_glucose_tolerance_test_in_male_rats_10_weeks_old_fed_a_diet_with_60per_fructose                                                 |
| 64  | glucose_concentrations_during_intraperitoneal_glucose_tolerance_test_120_min_after_glucose_load_in_male_rats_10_weeks_old_fed_a_diet_with_60per_fructose                      |
| 65  | glucose_concentrations_during_intraperitoneal_glucose_tolerance_test_30_min_after_glucose_load_in_male_rats_10_weeks_old_fed_a_diet_with_60per_fructose                       |
| 66  | glucose_concentrations_during_intraperitoneal_glucose_tolerance_test_60_min_after_glucose_load_in_male_rats_10_weeks_old_fed_a_diet_with_60per_fructose                       |
| 67  | hematocrit_at_the_age_of_30_days_in_males_fed_a_standard_chow                                                                                                                 |
| 68  | hematocrit_at_the_age_of_90_days_in_males_fed_a_standard_chow                                                                                                                 |
| 69  | insulin_concentrations_10_weeks_old_fed_a_diet_with_60per_fructose_from_8_weeks_to_10_weeks_15_days_male                                                                      |
| 70  | insulin_concentrations_8_weeks_old_fed_a_normal_lab_chow_0_days_male                                                                                                          |
| 71  | insulin_glucose_ratio_10_weeks_old_fed_a_diet_with_60per_fructose_from_8_weeks_to_10_weeks_male                                                                               |
| 72  | insulin_glucose_ratio_8_weeks_old_fed_a_normal_lab_chow_male                                                                                                                  |
| 73  | Insulin_nmohl                                                                                                                                                                 |
| 74  | insulin_stimulated_glycogenesis_in_diaphragm_nmohlucose_g_2h                                                                                                                  |
| 75  | insulin_stimulated_lipogenesis_in_epididymal_fat_nmohlucose_g2h                                                                                                               |
| 76  | insulin_stimulated_lipogenesis_in_epididymal_fat_nmohlucose_mg_protein2h                                                                                                      |
| 77  | insulin_stimulated_uptake_of_glucose_by_isolated_adipocytes_corrected_to_cell_volume                                                                                          |
| 78  | Interleukin6_IL12                                                                                                                                                             |
| 79  | Interleukin6_IL13                                                                                                                                                             |
| 80  | Interleukin6_IL6                                                                                                                                                              |
| 81  | Interleukin6_IL8                                                                                                                                                              |
| 82  | Interleukin6_IL9                                                                                                                                                              |
| 83  | isoproterenol_induced_lipolysis_of_isolated_adipocytes_corrected_to_cell                                                                                                      |
| 84  | isoproterenol_induced_lipolysis_of_isolated_adipocytes_corrected_to_cell_volume                                                                                               |
| 85  | isoproterenol_induced_lipolysis_of_isolated_adipocytes_corrected_to_volume_multiplied                                                                                         |
| 86  | isoproterenol_induced_lipolysis_of_isolated_adipocytes_uncorrected                                                                                                            |
| 87  | kidney_cortex_catalase_M_H2O2_min_mg_protein                                                                                                                                  |
| 88  | kidney_cortex_conjugated_dienes_nM_mg_protein                                                                                                                                 |
| 89  | kidney_cortex_glutathione_M_mg_protein                                                                                                                                        |
| 90  | kidney_cortex_glutathione_reductase_M_NADPH_min_mg_protein                                                                                                                    |
| 91  | kidney_cortex_GSH_Px_seleno_dependent_superoxide_peroxidase_M_GSH_min_mg_protein                                                                                              |
| 92  | kidney_cortex_SOD_superoxide_dismutase_U_mg_protein_10_wks_old_males                                                                                                          |
| 93  | kidney_cortex_TBARS_nM_mg_protein                                                                                                                                             |
| 94  | Kidney_weight                                                                                                                                                                 |
| 95  | Kidney_weight_corrected_to_body_weight                                                                                                                                        |
| 96  | Leptin                                                                                                                                                                        |
| 97  | Lipogenesis_in_epididymal_fat_0imp_g                                                                                                                                          |
| 98  | Lipogenesis_in_epididymal_fat_0imp_mgprot                                                                                                                                     |
| 99  | Lipogenesis_in_epididymal_fat_0nmohl_glg2h                                                                                                                                    |
| 100 | Lipogenesis_in_epididymal_fat_0nmohl_glmgp2h                                                                                                                                  |
| 101 | Lipogenesis_in_epididymal_fat_250imp_g                                                                                                                                        |
| 102 | Lipogenesis_in_epididymal_fat_250imp_mgprot                                                                                                                                   |
| 103 | Lipogenesis_in_epididymal_fat_250_nmohl_glg2h                                                                                                                                 |
| 104 | Lipogenesis_in_epididymal_fat_250nmohl_glmgp_2h                                                                                                                               |
| 105 | Lipolysis_Glycerol_0_level                                                                                                                                                    |
| 106 | Lipolysis_Glycerol_250_level                                                                                                                                                  |
| 107 | Lipolysis_NEFA_0_level                                                                                                                                                        |

108 liver\_conjugated\_dienes\_nM\_mg\_protein  
109 liver\_copper\_concentration\_after\_rats\_were\_fed\_a\_diet\_with\_high\_fat\_high\_cholesterol\_diet\_for\_4\_weeks\_whole\_liver\_pool  
110 liver\_glutathione\_M\_mg\_protein  
111 liver\_glutathione\_reductase\_M\_NADPH\_min\_mg\_protein  
112 liver\_GSH\_Px\_seleno\_dependent\_superoxide\_peroxidase\_M\_GSH\_min\_mg\_protein  
113 liver\_SOD\_superoxide\_dismutase\_U\_mg\_protein\_10\_wks\_old\_males  
114 liver\_TBARS\_nM\_mg\_protein  
115 liver\_triglycerides\_mmol\_g  
116 Liver\_weight  
117 Liver\_weight\_corrected\_to\_body\_weight  
118 liver\_weight\_g\_10\_wks\_old\_rats  
119 liver\_weight\_g\_10\_wks\_old\_rats\_corrected\_to\_100g\_body\_weight  
120 liver\_weight\_in\_males\_fed\_a\_high\_fat\_high\_cholesterol\_diet\_from\_the\_age\_of\_7\_weeks\_till\_the\_age\_of\_11\_weeks  
121 liver\_weights\_in\_males\_fed\_a\_high\_fat\_high\_cholesterol\_diet\_from\_the\_age\_of\_7\_weeks\_till\_the\_age\_of\_11\_weeks  
122 log\_maximal\_basal\_glucose\_uptake  
123 log\_of\_insulin\_glucose\_ratio\_day\_15\_2\_weeks\_of\_fructose\_feeding  
124 MAP\_mm\_Hg\_direct\_measurement\_in\_2007  
125 MAP\_mm\_Hg\_direct\_measurement\_in\_2008  
126 MAP\_mm\_Hg\_direct\_measurement\_in\_2009  
127 MAP\_mm\_Hg\_direct\_measurement\_in\_2010  
128 maximal\_basal\_glucose\_uptake  
129 maximal\_glucose\_uptake\_corrected\_to\_cell  
130 mean\_arterial\_pressure\_determined\_by\_direct\_puncture\_of\_the\_carotid\_artery\_under\_light\_ether\_anaesthesia\_in\_12\_week\_old\_males\_fed\_a\_normal\_lab\_chow\_at\_generations\_F16\_F17  
131 mean\_arterial\_pressure\_determined\_by\_direct\_puncture\_of\_the\_carotid\_artery\_under\_light\_ether\_anaesthesia\_in\_12\_week\_old\_males\_fed\_a\_normal\_lab\_chow\_at\_generations\_F16\_F18  
132 Monocyte\_chemotactic\_protein\_1  
133 Monocyte\_chemotactic\_protein\_2  
134 Monocyte\_chemotactic\_protein\_3  
135 Monocyte\_chemotactic\_protein\_4  
136 Monocyte\_chemotactic\_protein\_5  
137 Monocyte\_chemotactic\_protein\_6  
138 Monocyte\_chemotactic\_protein\_7  
139 Muscle\_Glycogen\_0imp\_g  
140 Muscle\_Glycogen\_0\_nmoll\_g\_2h  
141 Muscle\_Glycogen\_250imp\_g  
142 Muscle\_Glycogen\_250nmoll\_g\_2h  
143 muscle\_triglycerides\_mmol\_g  
144 number\_of\_fetuses\_in\_left\_horn\_of\_the\_uterus  
145 number\_of\_fetuses\_in\_right\_horn\_of\_the\_uterus  
146 number\_of\_pups\_in\_first\_litter  
147 OGTT\_of\_0\_mmoll\_glycemia  
148 OGTT\_of\_0\_mmoll\_insulin  
149 OGTT\_of\_120\_mmoll\_glycemia  
150 OGTT\_of\_30\_mmoll\_glycemia  
151 OGTT\_of\_30\_mmoll\_insulin  
152 OGTT\_of\_60\_mmoll\_glycemia  
153 OGTT\_of\_60\_mmoll\_insulin  
154 placental\_weights\_g\_in\_left\_horn\_of\_the\_uterus  
155 placental\_weights\_g\_in\_right\_horn\_of\_the\_uterus  
156 plasma\_ALP\_UL  
157 plasma\_K\_mmoll  
158 plasma\_Mg\_mmoll  
159 plasma\_P\_mmoll  
160 plasma\_urea\_mmoll\_10\_wks\_old\_males  
161 PNMT  
162 Protein\_percentage\_in\_epididymal\_fat  
163 protein\_percentage\_in\_epididymal\_fat\_1  
164 protein\_percentage\_in\_epididymal\_fat\_2  
165 pulse\_pressure\_determined\_by\_direct\_puncture\_of\_the\_carotid\_artery\_under\_light\_ether\_anaesthesia\_in\_12\_week\_old\_males\_fed\_a\_normal\_lab\_chow\_at\_generations\_F16\_F17  
166 relative\_kidney\_weight\_in\_5\_week\_old\_males  
167 relative\_kidney\_weight\_in\_8\_week\_old\_males  
168 relative\_left\_ventricle\_weight\_determined\_in\_12\_week\_old\_males\_fed\_a\_normal\_lab\_chow\_at\_generations\_F16\_F19  
169 relative\_weight\_of\_the\_fat\_pad  
170 residual\_MAP\_mm\_Hg  
171 serum\_ACTH\_levels\_after\_20\_min\_of\_immobilization\_stress\_in\_10\_weeks\_old\_males  
172 Serum\_CgA  
173 Serum\_CgB  
174 serum\_Chga\_chromogranin\_A\_fragments\_ml  
175 serum\_Chgb\_chromogranin\_B\_fragments\_ml  
176 Serum\_chloride  
177 serum\_cholesterol\_concentrations\_10\_weeks\_old\_fed\_a\_diet\_with\_60per\_fructose\_from\_8\_weeks\_to\_10\_weeks\_male  
178 serum\_cholesterol\_concentrations\_in\_male\_rats\_8\_weeks\_old\_fed\_a\_normal\_lab\_chow  
179 serum\_cholesterol\_concentrations\_in\_male\_rats\_9  
180 serum\_corticosteron\_levels\_after\_120\_min\_of\_immobilization\_stress\_in\_10\_weeks\_old\_males  
181 serum\_corticosteron\_levels\_after\_20\_min\_of\_immobilization\_stress\_in\_10\_weeks\_old\_males  
182 serum\_corticosteron\_levels\_after\_40\_min\_of\_immobilization\_stress\_in\_10\_weeks\_old\_males  
183 serum\_corticosteron\_levels\_after\_80\_min\_of\_immobilization\_stress\_in\_10\_weeks\_old\_males  
184 serum\_C\_reactive\_protein\_mg\_ml  
185 serum\_cysteine\_mmoll  
186 serum\_cystglycine\_mmoll  
187 Serum\_dopamine  
188 serum\_dopamine\_ngml  
189 Serum\_Epinephrine  
190 serum\_epinephrine\_ngml  
191 serum\_glutathione\_mmoll  
192 serum\_HDL2\_cholesterol\_concentrations\_in\_11\_week\_old\_males\_fed\_a\_high\_fat\_high\_cholesterol\_diet\_for\_4\_weeks  
193 serum\_HDL2\_cholesterol\_concentrations\_in\_7\_week\_old\_males\_fed\_a\_standard\_chow  
194 serum\_HDL2\_phospholipid\_concentrations\_in\_11\_week\_old\_males\_fed\_a\_high\_fat\_high\_cholesterol\_diet\_for\_4\_weeks  
195 serum\_HDL2\_phospholipid\_concentrations\_in\_7\_week\_old\_males\_fed\_a\_standard\_chow  
196 serum\_HDL3\_cholesterol\_concentrations\_in\_7\_week\_old\_males\_fed\_a\_standard\_chow  
197 serum\_HDL3\_phospholipid\_concentrations\_in\_7\_week\_old\_males\_fed\_a\_standard\_chow  
198 serum\_HDL\_cholesterol\_concentrations\_in\_male\_rats\_10\_weeks\_old\_fed\_a\_diet\_with\_60per\_fructose\_from\_8\_weeks\_to\_10\_weeks  
199 serum\_homocysteine\_mmoll  
200 serum\_IDL\_cholesterol\_concentrations\_in\_11\_week\_old\_males\_fed\_a\_high\_fat\_high\_cholesterol\_diet\_for\_4\_weeks  
201 serum\_IDL\_phospholipid\_concentrations\_in\_11\_week\_old\_males\_fed\_a\_high\_fat\_high\_cholesterol\_diet\_for\_4\_weeks  
202 serum\_IDL\_phospholipid\_concentrations\_in\_7\_week\_old\_males\_fed\_a\_standard\_chow  
203 serum\_insulin\_nmoll\_0\_min\_during\_OGTT  
204 serum\_insulin\_nmoll\_120\_min\_during\_OGTT  
205 serum\_insulin\_nmoll\_60\_min\_during\_OGTT  
206 serum\_insulin\_nmoll\_nofasted\_10\_wks  
207 serum\_LDL\_cholesterol\_concentrations\_in\_11\_week\_old\_males\_fed\_a\_high\_fat\_high\_cholesterol\_diet\_for\_4\_weeks  
208 serum\_LDL\_cholesterol\_concentrations\_in\_7\_week\_old\_males\_fed\_a\_standard\_chow  
209 serum\_LDL\_phospholipid\_concentrations\_in\_11\_week\_old\_males\_fed\_a\_high\_fat\_high\_cholesterol\_diet\_for\_4\_weeks  
210 serum\_LDL\_phospholipid\_concentrations\_in\_7\_week\_old\_males\_fed\_a\_standard\_chow  
211 serum\_nitric\_oxide\_in\_male\_rats\_fed\_a\_standard\_chow  
212 Serum\_Norepinephrine  
213 serum\_norepinephrine\_ngml  
214 Serum\_osmolarity  
215 serum\_Scg2\_secretogranin\_II\_fragments\_ml  
216 Serum\_Sgl

217 Serum\_sodium  
218 serum\_total\_cholesterol\_concentration\_in\_7\_week\_old\_males\_fed\_a\_standard\_chow  
219 serum\_total\_cholesterol\_concentrations\_in\_11\_week\_old\_males\_fed\_a\_high\_fat\_high\_cholesterol\_diet\_for\_4\_weeks  
220 serum\_total\_phospholipid\_concentrations\_in\_11\_week\_old\_males\_fed\_a\_high\_fat\_high\_cholesterol\_diet\_for\_4\_weeks  
221 serum\_total\_phospholipid\_concentrations\_in\_7\_week\_old\_males\_fed\_a\_standard\_chow  
222 serum\_triglyceride\_concentrations\_in\_male\_rats\_8\_weeks\_old\_fed\_a\_normal\_lab\_chow  
223 serum\_triglyceride\_concentrations\_in\_male\_rats\_9\_weeks\_old\_fed\_a\_diet\_with\_60per\_fructose\_from\_8\_weeks\_to\_9\_weeks  
224 serum\_VLDL\_cholesterol\_concentrations\_in\_11\_week\_old\_males\_fed\_a\_high\_fat\_high\_cholesterol\_diet\_for\_4\_weeks  
225 serum\_VLDL\_cholesterol\_concentrations\_in\_7\_week\_old\_males\_fed\_a\_standard\_chow  
226 serum\_VLDL\_phospholipid\_concentrations\_in\_11\_week\_old\_males\_fed\_a\_high\_fat\_high\_cholesterol\_diet\_for\_4\_weeks  
227 serum\_VLDL\_phospholipid\_concentrations\_in\_7\_week\_old\_males\_fed\_a\_standard\_chow  
228 SgII  
229 systolic\_blood\_pressure\_determined\_by\_direct\_puncture\_of\_the\_carotid\_artery\_under\_light\_ether\_anaesthesia\_in\_12\_week\_old\_males\_fed\_a\_normal\_lab\_chow\_at\_generations\_F16\_F17  
230 systolic\_blood\_pressure\_determined\_by\_direct\_puncture\_of\_the\_carotid\_artery\_under\_light\_ether\_anaesthesia\_in\_12\_week\_old\_males\_fed\_a\_normal\_lab\_chow\_at\_generations\_F16\_F18  
231 total\_plasma\_protein\_gL  
232 Triglyceride\_Liver  
233 Triglyceride\_Muscle  
234 Triglycerides\_mmoll\_decapitated  
235 urine\_adrenaline\_concentration  
236 urine\_Ca\_mmoll  
237 urine\_Cl\_mmoll  
238 urine\_creatinine\_mmoll  
239 urine\_dopamine\_concentration  
240 urine\_K\_mmoll  
241 urine\_Na\_mmoll  
242 urine\_noradrenaline\_concentration  
243 urine\_P\_mmoll  
244 urine\_protein\_g\_L  
245 urine\_urea\_mmoll  
246 weeks\_old\_fed\_a\_diet\_with\_60per\_fructose\_from\_8\_weeks\_to\_9\_weeks  
247 Weight\_Measure\_during\_Oral\_Glucose\_Tolerance\_Test  
248 weight\_of\_rats\_males\_12\_weeks\_old  
249 wet\_weight\_of\_copper\_concentration\_in\_livers

---
