# Supplementary material for: Genetic Analysis of the Cardiac Methylome at Single Nucleotide Resolution in a Model of Human Cardiovascular Disease
Source: PLoS Genet. 2014 Dec 4;10(12):e1004813. doi: 10.1371/journal.pgen.1004813 (PMC4256262; doi:10.1371/journal.pgen.1004813)
Supplement: Table S8 — Mapping and filtering of whole genome bisulfite sequencing reads generated in reciprocal F1 crosses. (PDF) [file pgen.1004813.s021.pdf]

**Table S8 Mapping and filtering of whole genome bisulfite sequencing reads generated in reciprocal F1 crosses**

| Sample              | Total Reads  | Mapped Reads |           | Mapped Bases | Depth of Coverage | Mapped Bases After Filtering | Depth of Coverage After Filtering |
|---------------------|--------------|--------------|-----------|--------------|-------------------|------------------------------|-----------------------------------|
|                     | [millions]   | [millions]   | [%]       | [billions]   | [x-fold]          | [billions]                   | [x-fold]                          |
| BNxSHR1             | 750          | 695          | 93        | 63.2         | 24.6              | 43.5                         | 16.9                              |
| BNxSHR2             | 726          | 672          | 93        | 62.4         | 24.3              | 43.1                         | 16.8                              |
| BNxSHR3             | 662          | 616          | 93        | 57.4         | 22.3              | 39.2                         | 15.2                              |
| BNxSHR4             | 733          | 680          | 93        | 63.0         | 24.5              | 42.5                         | 16.5                              |
| <b>BNxSHR total</b> | <b>2,871</b> | <b>2,662</b> | <b>93</b> | <b>245.9</b> | <b>95.6</b>       | <b>168.2</b>                 | <b>65.4</b>                       |
| SHRxBN1             | 916          | 843          | 92        | 76.6         | 29.8              | 50.5                         | 19.6                              |
| SHRxBN2             | 641          | 587          | 92        | 54.6         | 21.2              | 36.3                         | 14.1                              |
| SHRxBN3             | 902          | 819          | 91        | 72.3         | 28.1              | 47.8                         | 18.6                              |
| SHRxBN4             | 1,077        | 976          | 91        | 87.6         | 34.1              | 58.0                         | 22.6                              |
| <b>SHRxBN total</b> | <b>3,536</b> | <b>3,225</b> | <b>91</b> | <b>291.1</b> | <b>113.2</b>      | <b>192.6</b>                 | <b>74.9</b>                       |

Summary of the number of reads obtained for each sample, the proportion of reads mapped to the bisulfite-converted genome and the depth of coverage of the genome before and after quality filtering of the data set. The genome is defined as the mappable (ungapped) sequence of the RGSC3.4 reference assembly (total length=2,571,531,505bp).
